# Supplementary material for: Hypertension Treatment in Nigeria (HTN) Program: rationale and design for a type 2 hybrid, effectiveness, and implementation interrupted time series trial
Source: PubMed Central journal article supplement (PMC9344662; doi:10.1186/s43058-022-00328-9), 2022-08-02
Supplement: 43058_2022_328_MOESM3_ESM.pdf [file 43058_2022_328_MOESM3_ESM.pdf]

# HTN Enrollment Registry: Site Number

V1.2 27 January 2020

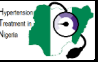

| Facility Information               |                              |                                                       |           |         |            |                                                       |                            |                |                  |                          |
|------------------------------------|------------------------------|-------------------------------------------------------|-----------|---------|------------|-------------------------------------------------------|----------------------------|----------------|------------------|--------------------------|
| Council Area:                      |                              |                                                       | Ward:     |         |            | Health Center Name:                                   |                            |                |                  |                          |
| Patient Identification Information |                              |                                                       |           |         |            |                                                       |                            |                |                  |                          |
| Patient ID#                        | Registration Date (DD/MM/YY) | New HTN Diagnosis                                     | Unique ID | Surname | First Name | Gender                                                | Date of Birth (DD/MM/YYYY) | Phone Number 1 | Next of Kin Name | Next of Kin Phone Number |
| 0001                               | ___/___/___                  | <input type="checkbox"/> Y <input type="checkbox"/> N |           |         |            | <input type="checkbox"/> M <input type="checkbox"/> F | ___/___/_____              |                |                  |                          |
| 0002                               | ___/___/___                  | <input type="checkbox"/> Y <input type="checkbox"/> N |           |         |            | <input type="checkbox"/> M <input type="checkbox"/> F | ___/___/_____              |                |                  |                          |
| 0003                               | ___/___/___                  | <input type="checkbox"/> Y <input type="checkbox"/> N |           |         |            | <input type="checkbox"/> M <input type="checkbox"/> F | ___/___/_____              |                |                  |                          |
| 0004                               | ___/___/___                  | <input type="checkbox"/> Y <input type="checkbox"/> N |           |         |            | <input type="checkbox"/> M <input type="checkbox"/> F | ___/___/_____              |                |                  |                          |
| 0005                               | ___/___/___                  | <input type="checkbox"/> Y <input type="checkbox"/> N |           |         |            | <input type="checkbox"/> M <input type="checkbox"/> F | ___/___/_____              |                |                  |                          |
| 0006                               | ___/___/___                  | <input type="checkbox"/> Y <input type="checkbox"/> N |           |         |            | <input type="checkbox"/> M <input type="checkbox"/> F | ___/___/_____              |                |                  |                          |
| 0007                               | ___/___/___                  | <input type="checkbox"/> Y <input type="checkbox"/> N |           |         |            | <input type="checkbox"/> M <input type="checkbox"/> F | ___/___/_____              |                |                  |                          |
| 0008                               | ___/___/___                  | <input type="checkbox"/> Y <input type="checkbox"/> N |           |         |            | <input type="checkbox"/> M <input type="checkbox"/> F | ___/___/_____              |                |                  |                          |
| 0009                               | ___/___/___                  | <input type="checkbox"/> Y <input type="checkbox"/> N |           |         |            | <input type="checkbox"/> M <input type="checkbox"/> F | ___/___/_____              |                |                  |                          |
| 0010                               | ___/___/___                  | <input type="checkbox"/> Y <input type="checkbox"/> N |           |         |            | <input type="checkbox"/> M <input type="checkbox"/> F | ___/___/_____              |                |                  |                          |
| 0011                               | ___/___/___                  | <input type="checkbox"/> Y <input type="checkbox"/> N |           |         |            | <input type="checkbox"/> M <input type="checkbox"/> F | ___/___/_____              |                |                  |                          |
| 0012                               | ___/___/___                  | <input type="checkbox"/> Y <input type="checkbox"/> N |           |         |            | <input type="checkbox"/> M <input type="checkbox"/> F | ___/___/_____              |                |                  |                          |
| 0013                               | ___/___/___                  | <input type="checkbox"/> Y <input type="checkbox"/> N |           |         |            | <input type="checkbox"/> M <input type="checkbox"/> F | ___/___/_____              |                |                  |                          |
| 0014                               | ___/___/___                  | <input type="checkbox"/> Y <input type="checkbox"/> N |           |         |            | <input type="checkbox"/> M <input type="checkbox"/> F | ___/___/_____              |                |                  |                          |
| 0015                               | ___/___/___                  | <input type="checkbox"/> Y <input type="checkbox"/> N |           |         |            | <input type="checkbox"/> M <input type="checkbox"/> F | ___/___/_____              |                |                  |                          |
| 0016                               | ___/___/___                  | <input type="checkbox"/> Y <input type="checkbox"/> N |           |         |            | <input type="checkbox"/> M <input type="checkbox"/> F | ___/___/_____              |                |                  |                          |
| 0017                               | ___/___/___                  | <input type="checkbox"/> Y <input type="checkbox"/> N |           |         |            | <input type="checkbox"/> M <input type="checkbox"/> F | ___/___/_____              |                |                  |                          |
| 0018                               | ___/___/___                  | <input type="checkbox"/> Y <input type="checkbox"/> N |           |         |            | <input type="checkbox"/> M <input type="checkbox"/> F | ___/___/_____              |                |                  |                          |
| 0019                               | ___/___/___                  | <input type="checkbox"/> Y <input type="checkbox"/> N |           |         |            | <input type="checkbox"/> M <input type="checkbox"/> F | ___/___/_____              |                |                  |                          |
| 0020                               | ___/___/___                  | <input type="checkbox"/> Y <input type="checkbox"/> N |           |         |            | <input type="checkbox"/> M <input type="checkbox"/> F | ___/___/_____              |                |                  |                          |
| 0021                               | ___/___/___                  | <input type="checkbox"/> Y <input type="checkbox"/> N |           |         |            | <input type="checkbox"/> M <input type="checkbox"/> F | ___/___/_____              |                |                  |                          |
| 0022                               | ___/___/___                  | <input type="checkbox"/> Y <input type="checkbox"/> N |           |         |            | <input type="checkbox"/> M <input type="checkbox"/> F | ___/___/_____              |                |                  |                          |
| 0023                               | ___/___/___                  | <input type="checkbox"/> Y <input type="checkbox"/> N |           |         |            | <input type="checkbox"/> M <input type="checkbox"/> F | ___/___/_____              |                |                  |                          |
| 0024                               | ___/___/___                  | <input type="checkbox"/> Y <input type="checkbox"/> N |           |         |            | <input type="checkbox"/> M <input type="checkbox"/> F | ___/___/_____              |                |                  |                          |
| 0025                               | ___/___/___                  | <input type="checkbox"/> Y <input type="checkbox"/> N |           |         |            | <input type="checkbox"/> M <input type="checkbox"/> F | ___/___/_____              |                |                  |                          |
| 0026                               | ___/___/___                  | <input type="checkbox"/> Y <input type="checkbox"/> N |           |         |            | <input type="checkbox"/> M <input type="checkbox"/> F | ___/___/_____              |                |                  |                          |
| 0027                               | ___/___/___                  | <input type="checkbox"/> Y <input type="checkbox"/> N |           |         |            | <input type="checkbox"/> M <input type="checkbox"/> F | ___/___/_____              |                |                  |                          |
| 0028                               | ___/___/___                  | <input type="checkbox"/> Y <input type="checkbox"/> N |           |         |            | <input type="checkbox"/> M <input type="checkbox"/> F | ___/___/_____              |                |                  |                          |
| 0029                               | ___/___/___                  | <input type="checkbox"/> Y <input type="checkbox"/> N |           |         |            | <input type="checkbox"/> M <input type="checkbox"/> F | ___/___/_____              |                |                  |                          |
| 0030                               | ___/___/___                  | <input type="checkbox"/> Y <input type="checkbox"/> N |           |         |            | <input type="checkbox"/> M <input type="checkbox"/> F | ___/___/_____              |                |                  |                          |
| 0031                               | ___/___/___                  | <input type="checkbox"/> Y <input type="checkbox"/> N |           |         |            | <input type="checkbox"/> M <input type="checkbox"/> F | ___/___/_____              |                |                  |                          |
| 0032                               | ___/___/___                  | <input type="checkbox"/> Y <input type="checkbox"/> N |           |         |            | <input type="checkbox"/> M <input type="checkbox"/> F | ___/___/_____              |                |                  |                          |
| 0033                               | ___/___/___                  | <input type="checkbox"/> Y <input type="checkbox"/> N |           |         |            | <input type="checkbox"/> M <input type="checkbox"/> F | ___/___/_____              |                |                  |                          |
| 0034                               | ___/___/___                  | <input type="checkbox"/> Y <input type="checkbox"/> N |           |         |            | <input type="checkbox"/> M <input type="checkbox"/> F | ___/___/_____              |                |                  |                          |

# HTN Enrollment Registry: Site Number

V1.2 27 January 2020



| Patient Identification Information |                              |                                                       |           |         |            |                                                       |                            |                |                  |                          |
|------------------------------------|------------------------------|-------------------------------------------------------|-----------|---------|------------|-------------------------------------------------------|----------------------------|----------------|------------------|--------------------------|
| Patient ID#                        | Registration Date (DD/MM/YY) | New HTN Diagnosis                                     | Unique ID | Surname | First Name | Gender                                                | Date of Birth (DD/MM/YYYY) | Phone Number 1 | Next of Kin Name | Next of Kin Phone Number |
| 0035                               | ___/___/___                  | <input type="checkbox"/> Y <input type="checkbox"/> N |           |         |            | <input type="checkbox"/> M <input type="checkbox"/> F | ___/___/_____              |                |                  |                          |
| 0036                               | ___/___/___                  | <input type="checkbox"/> Y <input type="checkbox"/> N |           |         |            | <input type="checkbox"/> M <input type="checkbox"/> F | ___/___/_____              |                |                  |                          |
| 0037                               | ___/___/___                  | <input type="checkbox"/> Y <input type="checkbox"/> N |           |         |            | <input type="checkbox"/> M <input type="checkbox"/> F | ___/___/_____              |                |                  |                          |
| 0038                               | ___/___/___                  | <input type="checkbox"/> Y <input type="checkbox"/> N |           |         |            | <input type="checkbox"/> M <input type="checkbox"/> F | ___/___/_____              |                |                  |                          |
| 0039                               | ___/___/___                  | <input type="checkbox"/> Y <input type="checkbox"/> N |           |         |            | <input type="checkbox"/> M <input type="checkbox"/> F | ___/___/_____              |                |                  |                          |
| 0040                               | ___/___/___                  | <input type="checkbox"/> Y <input type="checkbox"/> N |           |         |            | <input type="checkbox"/> M <input type="checkbox"/> F | ___/___/_____              |                |                  |                          |
| 0041                               | ___/___/___                  | <input type="checkbox"/> Y <input type="checkbox"/> N |           |         |            | <input type="checkbox"/> M <input type="checkbox"/> F | ___/___/_____              |                |                  |                          |
| 0042                               | ___/___/___                  | <input type="checkbox"/> Y <input type="checkbox"/> N |           |         |            | <input type="checkbox"/> M <input type="checkbox"/> F | ___/___/_____              |                |                  |                          |
| 0043                               | ___/___/___                  | <input type="checkbox"/> Y <input type="checkbox"/> N |           |         |            | <input type="checkbox"/> M <input type="checkbox"/> F | ___/___/_____              |                |                  |                          |
| 0044                               | ___/___/___                  | <input type="checkbox"/> Y <input type="checkbox"/> N |           |         |            | <input type="checkbox"/> M <input type="checkbox"/> F | ___/___/_____              |                |                  |                          |
| 0045                               | ___/___/___                  | <input type="checkbox"/> Y <input type="checkbox"/> N |           |         |            | <input type="checkbox"/> M <input type="checkbox"/> F | ___/___/_____              |                |                  |                          |
| 0046                               | ___/___/___                  | <input type="checkbox"/> Y <input type="checkbox"/> N |           |         |            | <input type="checkbox"/> M <input type="checkbox"/> F | ___/___/_____              |                |                  |                          |
| 0047                               | ___/___/___                  | <input type="checkbox"/> Y <input type="checkbox"/> N |           |         |            | <input type="checkbox"/> M <input type="checkbox"/> F | ___/___/_____              |                |                  |                          |
| 0048                               | ___/___/___                  | <input type="checkbox"/> Y <input type="checkbox"/> N |           |         |            | <input type="checkbox"/> M <input type="checkbox"/> F | ___/___/_____              |                |                  |                          |
| 0049                               | ___/___/___                  | <input type="checkbox"/> Y <input type="checkbox"/> N |           |         |            | <input type="checkbox"/> M <input type="checkbox"/> F | ___/___/_____              |                |                  |                          |
| 0050                               | ___/___/___                  | <input type="checkbox"/> Y <input type="checkbox"/> N |           |         |            | <input type="checkbox"/> M <input type="checkbox"/> F | ___/___/_____              |                |                  |                          |
| 0051                               | ___/___/___                  | <input type="checkbox"/> Y <input type="checkbox"/> N |           |         |            | <input type="checkbox"/> M <input type="checkbox"/> F | ___/___/_____              |                |                  |                          |
| 0052                               | ___/___/___                  | <input type="checkbox"/> Y <input type="checkbox"/> N |           |         |            | <input type="checkbox"/> M <input type="checkbox"/> F | ___/___/_____              |                |                  |                          |
| 0053                               | ___/___/___                  | <input type="checkbox"/> Y <input type="checkbox"/> N |           |         |            | <input type="checkbox"/> M <input type="checkbox"/> F | ___/___/_____              |                |                  |                          |
| 0054                               | ___/___/___                  | <input type="checkbox"/> Y <input type="checkbox"/> N |           |         |            | <input type="checkbox"/> M <input type="checkbox"/> F | ___/___/_____              |                |                  |                          |
| 0055                               | ___/___/___                  | <input type="checkbox"/> Y <input type="checkbox"/> N |           |         |            | <input type="checkbox"/> M <input type="checkbox"/> F | ___/___/_____              |                |                  |                          |
| 0056                               | ___/___/___                  | <input type="checkbox"/> Y <input type="checkbox"/> N |           |         |            | <input type="checkbox"/> M <input type="checkbox"/> F | ___/___/_____              |                |                  |                          |
| 0057                               | ___/___/___                  | <input type="checkbox"/> Y <input type="checkbox"/> N |           |         |            | <input type="checkbox"/> M <input type="checkbox"/> F | ___/___/_____              |                |                  |                          |
| 0058                               | ___/___/___                  | <input type="checkbox"/> Y <input type="checkbox"/> N |           |         |            | <input type="checkbox"/> M <input type="checkbox"/> F | ___/___/_____              |                |                  |                          |
| 0059                               | ___/___/___                  | <input type="checkbox"/> Y <input type="checkbox"/> N |           |         |            | <input type="checkbox"/> M <input type="checkbox"/> F | ___/___/_____              |                |                  |                          |
| 0060                               | ___/___/___                  | <input type="checkbox"/> Y <input type="checkbox"/> N |           |         |            | <input type="checkbox"/> M <input type="checkbox"/> F | ___/___/_____              |                |                  |                          |
| 0061                               | ___/___/___                  | <input type="checkbox"/> Y <input type="checkbox"/> N |           |         |            | <input type="checkbox"/> M <input type="checkbox"/> F | ___/___/_____              |                |                  |                          |
| 0062                               | ___/___/___                  | <input type="checkbox"/> Y <input type="checkbox"/> N |           |         |            | <input type="checkbox"/> M <input type="checkbox"/> F | ___/___/_____              |                |                  |                          |
| 0063                               | ___/___/___                  | <input type="checkbox"/> Y <input type="checkbox"/> N |           |         |            | <input type="checkbox"/> M <input type="checkbox"/> F | ___/___/_____              |                |                  |                          |
| 0064                               | ___/___/___                  | <input type="checkbox"/> Y <input type="checkbox"/> N |           |         |            | <input type="checkbox"/> M <input type="checkbox"/> F | ___/___/_____              |                |                  |                          |
| 0065                               | ___/___/___                  | <input type="checkbox"/> Y <input type="checkbox"/> N |           |         |            | <input type="checkbox"/> M <input type="checkbox"/> F | ___/___/_____              |                |                  |                          |
| 0066                               | ___/___/___                  | <input type="checkbox"/> Y <input type="checkbox"/> N |           |         |            | <input type="checkbox"/> M <input type="checkbox"/> F | ___/___/_____              |                |                  |                          |
| 0067                               | ___/___/___                  | <input type="checkbox"/> Y <input type="checkbox"/> N |           |         |            | <input type="checkbox"/> M <input type="checkbox"/> F | ___/___/_____              |                |                  |                          |
| 0068                               | ___/___/___                  | <input type="checkbox"/> Y <input type="checkbox"/> N |           |         |            | <input type="checkbox"/> M <input type="checkbox"/> F | ___/___/_____              |                |                  |                          |
| 0069                               | ___/___/___                  | <input type="checkbox"/> Y <input type="checkbox"/> N |           |         |            | <input type="checkbox"/> M <input type="checkbox"/> F | ___/___/_____              |                |                  |                          |
| 0070                               | ___/___/___                  | <input type="checkbox"/> Y <input type="checkbox"/> N |           |         |            | <input type="checkbox"/> M <input type="checkbox"/> F | ___/___/_____              |                |                  |                          |

# HTN Enrollment Registry: Site Number

V1.2 27 January 2020

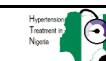

| Patient Identification Information |                              |                                                       |           |         |            |                                                       |                            |                |                  |                          |
|------------------------------------|------------------------------|-------------------------------------------------------|-----------|---------|------------|-------------------------------------------------------|----------------------------|----------------|------------------|--------------------------|
| Patient ID#                        | Registration Date (DD/MM/YY) | New HTN Diagnosis                                     | Unique ID | Surname | First Name | Gender                                                | Date of Birth (DD/MM/YYYY) | Phone Number 1 | Next of Kin Name | Next of Kin Phone Number |
| 0071                               | ___/___/___                  | <input type="checkbox"/> Y <input type="checkbox"/> N |           |         |            | <input type="checkbox"/> M <input type="checkbox"/> F | ___/___/_____              |                |                  |                          |
| 0072                               | ___/___/___                  | <input type="checkbox"/> Y <input type="checkbox"/> N |           |         |            | <input type="checkbox"/> M <input type="checkbox"/> F | ___/___/_____              |                |                  |                          |
| 0073                               | ___/___/___                  | <input type="checkbox"/> Y <input type="checkbox"/> N |           |         |            | <input type="checkbox"/> M <input type="checkbox"/> F | ___/___/_____              |                |                  |                          |
| 0074                               | ___/___/___                  | <input type="checkbox"/> Y <input type="checkbox"/> N |           |         |            | <input type="checkbox"/> M <input type="checkbox"/> F | ___/___/_____              |                |                  |                          |
| 0075                               | ___/___/___                  | <input type="checkbox"/> Y <input type="checkbox"/> N |           |         |            | <input type="checkbox"/> M <input type="checkbox"/> F | ___/___/_____              |                |                  |                          |
| 0076                               | ___/___/___                  | <input type="checkbox"/> Y <input type="checkbox"/> N |           |         |            | <input type="checkbox"/> M <input type="checkbox"/> F | ___/___/_____              |                |                  |                          |
| 0077                               | ___/___/___                  | <input type="checkbox"/> Y <input type="checkbox"/> N |           |         |            | <input type="checkbox"/> M <input type="checkbox"/> F | ___/___/_____              |                |                  |                          |
| 0078                               | ___/___/___                  | <input type="checkbox"/> Y <input type="checkbox"/> N |           |         |            | <input type="checkbox"/> M <input type="checkbox"/> F | ___/___/_____              |                |                  |                          |
| 0079                               | ___/___/___                  | <input type="checkbox"/> Y <input type="checkbox"/> N |           |         |            | <input type="checkbox"/> M <input type="checkbox"/> F | ___/___/_____              |                |                  |                          |
| 0080                               | ___/___/___                  | <input type="checkbox"/> Y <input type="checkbox"/> N |           |         |            | <input type="checkbox"/> M <input type="checkbox"/> F | ___/___/_____              |                |                  |                          |
| 0081                               | ___/___/___                  | <input type="checkbox"/> Y <input type="checkbox"/> N |           |         |            | <input type="checkbox"/> M <input type="checkbox"/> F | ___/___/_____              |                |                  |                          |
| 0082                               | ___/___/___                  | <input type="checkbox"/> Y <input type="checkbox"/> N |           |         |            | <input type="checkbox"/> M <input type="checkbox"/> F | ___/___/_____              |                |                  |                          |
| 0083                               | ___/___/___                  | <input type="checkbox"/> Y <input type="checkbox"/> N |           |         |            | <input type="checkbox"/> M <input type="checkbox"/> F | ___/___/_____              |                |                  |                          |
| 0084                               | ___/___/___                  | <input type="checkbox"/> Y <input type="checkbox"/> N |           |         |            | <input type="checkbox"/> M <input type="checkbox"/> F | ___/___/_____              |                |                  |                          |
| 0085                               | ___/___/___                  | <input type="checkbox"/> Y <input type="checkbox"/> N |           |         |            | <input type="checkbox"/> M <input type="checkbox"/> F | ___/___/_____              |                |                  |                          |
| 0086                               | ___/___/___                  | <input type="checkbox"/> Y <input type="checkbox"/> N |           |         |            | <input type="checkbox"/> M <input type="checkbox"/> F | ___/___/_____              |                |                  |                          |
| 0087                               | ___/___/___                  | <input type="checkbox"/> Y <input type="checkbox"/> N |           |         |            | <input type="checkbox"/> M <input type="checkbox"/> F | ___/___/_____              |                |                  |                          |
| 0088                               | ___/___/___                  | <input type="checkbox"/> Y <input type="checkbox"/> N |           |         |            | <input type="checkbox"/> M <input type="checkbox"/> F | ___/___/_____              |                |                  |                          |
| 0089                               | ___/___/___                  | <input type="checkbox"/> Y <input type="checkbox"/> N |           |         |            | <input type="checkbox"/> M <input type="checkbox"/> F | ___/___/_____              |                |                  |                          |
| 0090                               | ___/___/___                  | <input type="checkbox"/> Y <input type="checkbox"/> N |           |         |            | <input type="checkbox"/> M <input type="checkbox"/> F | ___/___/_____              |                |                  |                          |
| 0091                               | ___/___/___                  | <input type="checkbox"/> Y <input type="checkbox"/> N |           |         |            | <input type="checkbox"/> M <input type="checkbox"/> F | ___/___/_____              |                |                  |                          |
| 0092                               | ___/___/___                  | <input type="checkbox"/> Y <input type="checkbox"/> N |           |         |            | <input type="checkbox"/> M <input type="checkbox"/> F | ___/___/_____              |                |                  |                          |
| 0093                               | ___/___/___                  | <input type="checkbox"/> Y <input type="checkbox"/> N |           |         |            | <input type="checkbox"/> M <input type="checkbox"/> F | ___/___/_____              |                |                  |                          |
| 0094                               | ___/___/___                  | <input type="checkbox"/> Y <input type="checkbox"/> N |           |         |            | <input type="checkbox"/> M <input type="checkbox"/> F | ___/___/_____              |                |                  |                          |
| 0095                               | ___/___/___                  | <input type="checkbox"/> Y <input type="checkbox"/> N |           |         |            | <input type="checkbox"/> M <input type="checkbox"/> F | ___/___/_____              |                |                  |                          |
| 0096                               | ___/___/___                  | <input type="checkbox"/> Y <input type="checkbox"/> N |           |         |            | <input type="checkbox"/> M <input type="checkbox"/> F | ___/___/_____              |                |                  |                          |
| 0097                               | ___/___/___                  | <input type="checkbox"/> Y <input type="checkbox"/> N |           |         |            | <input type="checkbox"/> M <input type="checkbox"/> F | ___/___/_____              |                |                  |                          |
| 0098                               | ___/___/___                  | <input type="checkbox"/> Y <input type="checkbox"/> N |           |         |            | <input type="checkbox"/> M <input type="checkbox"/> F | ___/___/_____              |                |                  |                          |
| 0099                               | ___/___/___                  | <input type="checkbox"/> Y <input type="checkbox"/> N |           |         |            | <input type="checkbox"/> M <input type="checkbox"/> F | ___/___/_____              |                |                  |                          |
| 0100                               | ___/___/___                  | <input type="checkbox"/> Y <input type="checkbox"/> N |           |         |            | <input type="checkbox"/> M <input type="checkbox"/> F | ___/___/_____              |                |                  |                          |
| 0101                               | ___/___/___                  | <input type="checkbox"/> Y <input type="checkbox"/> N |           |         |            | <input type="checkbox"/> M <input type="checkbox"/> F | ___/___/_____              |                |                  |                          |
| 0102                               | ___/___/___                  | <input type="checkbox"/> Y <input type="checkbox"/> N |           |         |            | <input type="checkbox"/> M <input type="checkbox"/> F | ___/___/_____              |                |                  |                          |
| 0103                               | ___/___/___                  | <input type="checkbox"/> Y <input type="checkbox"/> N |           |         |            | <input type="checkbox"/> M <input type="checkbox"/> F | ___/___/_____              |                |                  |                          |
| 0104                               | ___/___/___                  | <input type="checkbox"/> Y <input type="checkbox"/> N |           |         |            | <input type="checkbox"/> M <input type="checkbox"/> F | ___/___/_____              |                |                  |                          |
| 0105                               | ___/___/___                  | <input type="checkbox"/> Y <input type="checkbox"/> N |           |         |            | <input type="checkbox"/> M <input type="checkbox"/> F | ___/___/_____              |                |                  |                          |
| 0106                               | ___/___/___                  | <input type="checkbox"/> Y <input type="checkbox"/> N |           |         |            | <input type="checkbox"/> M <input type="checkbox"/> F | ___/___/_____              |                |                  |                          |

# HTN Enrollment Registry: Site Number

V1.2 27 January 2020



| Patient Identification Information |                              |                                                       |           |         |            |                                                       |                            |                |                  |                          |
|------------------------------------|------------------------------|-------------------------------------------------------|-----------|---------|------------|-------------------------------------------------------|----------------------------|----------------|------------------|--------------------------|
| Patient ID#                        | Registration Date (DD/MM/YY) | New HTN Diagnosis                                     | Unique ID | Surname | First Name | Gender                                                | Date of Birth (DD/MM/YYYY) | Phone Number 1 | Next of Kin Name | Next of Kin Phone Number |
| 0107                               | ___/___/___                  | <input type="checkbox"/> Y <input type="checkbox"/> N |           |         |            | <input type="checkbox"/> M <input type="checkbox"/> F | ___/___/_____              |                |                  |                          |
| 0108                               | ___/___/___                  | <input type="checkbox"/> Y <input type="checkbox"/> N |           |         |            | <input type="checkbox"/> M <input type="checkbox"/> F | ___/___/_____              |                |                  |                          |
| 0109                               | ___/___/___                  | <input type="checkbox"/> Y <input type="checkbox"/> N |           |         |            | <input type="checkbox"/> M <input type="checkbox"/> F | ___/___/_____              |                |                  |                          |
| 0110                               | ___/___/___                  | <input type="checkbox"/> Y <input type="checkbox"/> N |           |         |            | <input type="checkbox"/> M <input type="checkbox"/> F | ___/___/_____              |                |                  |                          |
| 0111                               | ___/___/___                  | <input type="checkbox"/> Y <input type="checkbox"/> N |           |         |            | <input type="checkbox"/> M <input type="checkbox"/> F | ___/___/_____              |                |                  |                          |
| 0112                               | ___/___/___                  | <input type="checkbox"/> Y <input type="checkbox"/> N |           |         |            | <input type="checkbox"/> M <input type="checkbox"/> F | ___/___/_____              |                |                  |                          |
| 0113                               | ___/___/___                  | <input type="checkbox"/> Y <input type="checkbox"/> N |           |         |            | <input type="checkbox"/> M <input type="checkbox"/> F | ___/___/_____              |                |                  |                          |
| 0114                               | ___/___/___                  | <input type="checkbox"/> Y <input type="checkbox"/> N |           |         |            | <input type="checkbox"/> M <input type="checkbox"/> F | ___/___/_____              |                |                  |                          |
| 0115                               | ___/___/___                  | <input type="checkbox"/> Y <input type="checkbox"/> N |           |         |            | <input type="checkbox"/> M <input type="checkbox"/> F | ___/___/_____              |                |                  |                          |
| 0116                               | ___/___/___                  | <input type="checkbox"/> Y <input type="checkbox"/> N |           |         |            | <input type="checkbox"/> M <input type="checkbox"/> F | ___/___/_____              |                |                  |                          |
| 0117                               | ___/___/___                  | <input type="checkbox"/> Y <input type="checkbox"/> N |           |         |            | <input type="checkbox"/> M <input type="checkbox"/> F | ___/___/_____              |                |                  |                          |
| 0118                               | ___/___/___                  | <input type="checkbox"/> Y <input type="checkbox"/> N |           |         |            | <input type="checkbox"/> M <input type="checkbox"/> F | ___/___/_____              |                |                  |                          |
| 0119                               | ___/___/___                  | <input type="checkbox"/> Y <input type="checkbox"/> N |           |         |            | <input type="checkbox"/> M <input type="checkbox"/> F | ___/___/_____              |                |                  |                          |
| 0120                               | ___/___/___                  | <input type="checkbox"/> Y <input type="checkbox"/> N |           |         |            | <input type="checkbox"/> M <input type="checkbox"/> F | ___/___/_____              |                |                  |                          |
| 0121                               | ___/___/___                  | <input type="checkbox"/> Y <input type="checkbox"/> N |           |         |            | <input type="checkbox"/> M <input type="checkbox"/> F | ___/___/_____              |                |                  |                          |
| 0122                               | ___/___/___                  | <input type="checkbox"/> Y <input type="checkbox"/> N |           |         |            | <input type="checkbox"/> M <input type="checkbox"/> F | ___/___/_____              |                |                  |                          |
| 0123                               | ___/___/___                  | <input type="checkbox"/> Y <input type="checkbox"/> N |           |         |            | <input type="checkbox"/> M <input type="checkbox"/> F | ___/___/_____              |                |                  |                          |
| 0124                               | ___/___/___                  | <input type="checkbox"/> Y <input type="checkbox"/> N |           |         |            | <input type="checkbox"/> M <input type="checkbox"/> F | ___/___/_____              |                |                  |                          |
| 0125                               | ___/___/___                  | <input type="checkbox"/> Y <input type="checkbox"/> N |           |         |            | <input type="checkbox"/> M <input type="checkbox"/> F | ___/___/_____              |                |                  |                          |
| 0126                               | ___/___/___                  | <input type="checkbox"/> Y <input type="checkbox"/> N |           |         |            | <input type="checkbox"/> M <input type="checkbox"/> F | ___/___/_____              |                |                  |                          |
| 0127                               | ___/___/___                  | <input type="checkbox"/> Y <input type="checkbox"/> N |           |         |            | <input type="checkbox"/> M <input type="checkbox"/> F | ___/___/_____              |                |                  |                          |
| 0128                               | ___/___/___                  | <input type="checkbox"/> Y <input type="checkbox"/> N |           |         |            | <input type="checkbox"/> M <input type="checkbox"/> F | ___/___/_____              |                |                  |                          |
| 0129                               | ___/___/___                  | <input type="checkbox"/> Y <input type="checkbox"/> N |           |         |            | <input type="checkbox"/> M <input type="checkbox"/> F | ___/___/_____              |                |                  |                          |
| 0130                               | ___/___/___                  | <input type="checkbox"/> Y <input type="checkbox"/> N |           |         |            | <input type="checkbox"/> M <input type="checkbox"/> F | ___/___/_____              |                |                  |                          |
| 0131                               | ___/___/___                  | <input type="checkbox"/> Y <input type="checkbox"/> N |           |         |            | <input type="checkbox"/> M <input type="checkbox"/> F | ___/___/_____              |                |                  |                          |
| 0132                               | ___/___/___                  | <input type="checkbox"/> Y <input type="checkbox"/> N |           |         |            | <input type="checkbox"/> M <input type="checkbox"/> F | ___/___/_____              |                |                  |                          |
| 0133                               | ___/___/___                  | <input type="checkbox"/> Y <input type="checkbox"/> N |           |         |            | <input type="checkbox"/> M <input type="checkbox"/> F | ___/___/_____              |                |                  |                          |
| 0134                               | ___/___/___                  | <input type="checkbox"/> Y <input type="checkbox"/> N |           |         |            | <input type="checkbox"/> M <input type="checkbox"/> F | ___/___/_____              |                |                  |                          |
| 0135                               | ___/___/___                  | <input type="checkbox"/> Y <input type="checkbox"/> N |           |         |            | <input type="checkbox"/> M <input type="checkbox"/> F | ___/___/_____              |                |                  |                          |
| 0136                               | ___/___/___                  | <input type="checkbox"/> Y <input type="checkbox"/> N |           |         |            | <input type="checkbox"/> M <input type="checkbox"/> F | ___/___/_____              |                |                  |                          |
| 0137                               | ___/___/___                  | <input type="checkbox"/> Y <input type="checkbox"/> N |           |         |            | <input type="checkbox"/> M <input type="checkbox"/> F | ___/___/_____              |                |                  |                          |
| 0138                               | ___/___/___                  | <input type="checkbox"/> Y <input type="checkbox"/> N |           |         |            | <input type="checkbox"/> M <input type="checkbox"/> F | ___/___/_____              |                |                  |                          |
| 0139                               | ___/___/___                  | <input type="checkbox"/> Y <input type="checkbox"/> N |           |         |            | <input type="checkbox"/> M <input type="checkbox"/> F | ___/___/_____              |                |                  |                          |
| 0140                               | ___/___/___                  | <input type="checkbox"/> Y <input type="checkbox"/> N |           |         |            | <input type="checkbox"/> M <input type="checkbox"/> F | ___/___/_____              |                |                  |                          |
| 0141                               | ___/___/___                  | <input type="checkbox"/> Y <input type="checkbox"/> N |           |         |            | <input type="checkbox"/> M <input type="checkbox"/> F | ___/___/_____              |                |                  |                          |
| 0142                               | ___/___/___                  | <input type="checkbox"/> Y <input type="checkbox"/> N |           |         |            | <input type="checkbox"/> M <input type="checkbox"/> F | ___/___/_____              |                |                  |                          |

# HTN Enrollment Registry: Site Number

V1.2 27 January 2020



| Patient Identification Information |                              |                                                       |           |         |            |                                                       |                            |                |                  |                          |
|------------------------------------|------------------------------|-------------------------------------------------------|-----------|---------|------------|-------------------------------------------------------|----------------------------|----------------|------------------|--------------------------|
| Patient ID#                        | Registration Date (DD/MM/YY) | New HTN Diagnosis                                     | Unique ID | Surname | First Name | Gender                                                | Date of Birth (DD/MM/YYYY) | Phone Number 1 | Next of Kin Name | Next of Kin Phone Number |
| 0143                               | ___/___/___                  | <input type="checkbox"/> Y <input type="checkbox"/> N |           |         |            | <input type="checkbox"/> M <input type="checkbox"/> F | ___/___/_____              |                |                  |                          |
| 0144                               | ___/___/___                  | <input type="checkbox"/> Y <input type="checkbox"/> N |           |         |            | <input type="checkbox"/> M <input type="checkbox"/> F | ___/___/_____              |                |                  |                          |
| 0145                               | ___/___/___                  | <input type="checkbox"/> Y <input type="checkbox"/> N |           |         |            | <input type="checkbox"/> M <input type="checkbox"/> F | ___/___/_____              |                |                  |                          |
| 0146                               | ___/___/___                  | <input type="checkbox"/> Y <input type="checkbox"/> N |           |         |            | <input type="checkbox"/> M <input type="checkbox"/> F | ___/___/_____              |                |                  |                          |
| 0147                               | ___/___/___                  | <input type="checkbox"/> Y <input type="checkbox"/> N |           |         |            | <input type="checkbox"/> M <input type="checkbox"/> F | ___/___/_____              |                |                  |                          |
| 0148                               | ___/___/___                  | <input type="checkbox"/> Y <input type="checkbox"/> N |           |         |            | <input type="checkbox"/> M <input type="checkbox"/> F | ___/___/_____              |                |                  |                          |
| 0149                               | ___/___/___                  | <input type="checkbox"/> Y <input type="checkbox"/> N |           |         |            | <input type="checkbox"/> M <input type="checkbox"/> F | ___/___/_____              |                |                  |                          |
| 0150                               | ___/___/___                  | <input type="checkbox"/> Y <input type="checkbox"/> N |           |         |            | <input type="checkbox"/> M <input type="checkbox"/> F | ___/___/_____              |                |                  |                          |
| 0151                               | ___/___/___                  | <input type="checkbox"/> Y <input type="checkbox"/> N |           |         |            | <input type="checkbox"/> M <input type="checkbox"/> F | ___/___/_____              |                |                  |                          |
| 0152                               | ___/___/___                  | <input type="checkbox"/> Y <input type="checkbox"/> N |           |         |            | <input type="checkbox"/> M <input type="checkbox"/> F | ___/___/_____              |                |                  |                          |
| 0153                               | ___/___/___                  | <input type="checkbox"/> Y <input type="checkbox"/> N |           |         |            | <input type="checkbox"/> M <input type="checkbox"/> F | ___/___/_____              |                |                  |                          |
| 0154                               | ___/___/___                  | <input type="checkbox"/> Y <input type="checkbox"/> N |           |         |            | <input type="checkbox"/> M <input type="checkbox"/> F | ___/___/_____              |                |                  |                          |
| 0155                               | ___/___/___                  | <input type="checkbox"/> Y <input type="checkbox"/> N |           |         |            | <input type="checkbox"/> M <input type="checkbox"/> F | ___/___/_____              |                |                  |                          |
| 0156                               | ___/___/___                  | <input type="checkbox"/> Y <input type="checkbox"/> N |           |         |            | <input type="checkbox"/> M <input type="checkbox"/> F | ___/___/_____              |                |                  |                          |
| 0157                               | ___/___/___                  | <input type="checkbox"/> Y <input type="checkbox"/> N |           |         |            | <input type="checkbox"/> M <input type="checkbox"/> F | ___/___/_____              |                |                  |                          |
| 0158                               | ___/___/___                  | <input type="checkbox"/> Y <input type="checkbox"/> N |           |         |            | <input type="checkbox"/> M <input type="checkbox"/> F | ___/___/_____              |                |                  |                          |
| 0159                               | ___/___/___                  | <input type="checkbox"/> Y <input type="checkbox"/> N |           |         |            | <input type="checkbox"/> M <input type="checkbox"/> F | ___/___/_____              |                |                  |                          |
| 0160                               | ___/___/___                  | <input type="checkbox"/> Y <input type="checkbox"/> N |           |         |            | <input type="checkbox"/> M <input type="checkbox"/> F | ___/___/_____              |                |                  |                          |
| 0161                               | ___/___/___                  | <input type="checkbox"/> Y <input type="checkbox"/> N |           |         |            | <input type="checkbox"/> M <input type="checkbox"/> F | ___/___/_____              |                |                  |                          |
| 0162                               | ___/___/___                  | <input type="checkbox"/> Y <input type="checkbox"/> N |           |         |            | <input type="checkbox"/> M <input type="checkbox"/> F | ___/___/_____              |                |                  |                          |
| 0163                               | ___/___/___                  | <input type="checkbox"/> Y <input type="checkbox"/> N |           |         |            | <input type="checkbox"/> M <input type="checkbox"/> F | ___/___/_____              |                |                  |                          |
| 0164                               | ___/___/___                  | <input type="checkbox"/> Y <input type="checkbox"/> N |           |         |            | <input type="checkbox"/> M <input type="checkbox"/> F | ___/___/_____              |                |                  |                          |
| 0165                               | ___/___/___                  | <input type="checkbox"/> Y <input type="checkbox"/> N |           |         |            | <input type="checkbox"/> M <input type="checkbox"/> F | ___/___/_____              |                |                  |                          |
| 0166                               | ___/___/___                  | <input type="checkbox"/> Y <input type="checkbox"/> N |           |         |            | <input type="checkbox"/> M <input type="checkbox"/> F | ___/___/_____              |                |                  |                          |
| 0167                               | ___/___/___                  | <input type="checkbox"/> Y <input type="checkbox"/> N |           |         |            | <input type="checkbox"/> M <input type="checkbox"/> F | ___/___/_____              |                |                  |                          |
| 0168                               | ___/___/___                  | <input type="checkbox"/> Y <input type="checkbox"/> N |           |         |            | <input type="checkbox"/> M <input type="checkbox"/> F | ___/___/_____              |                |                  |                          |
| 0169                               | ___/___/___                  | <input type="checkbox"/> Y <input type="checkbox"/> N |           |         |            | <input type="checkbox"/> M <input type="checkbox"/> F | ___/___/_____              |                |                  |                          |
| 0170                               | ___/___/___                  | <input type="checkbox"/> Y <input type="checkbox"/> N |           |         |            | <input type="checkbox"/> M <input type="checkbox"/> F | ___/___/_____              |                |                  |                          |
| 0171                               | ___/___/___                  | <input type="checkbox"/> Y <input type="checkbox"/> N |           |         |            | <input type="checkbox"/> M <input type="checkbox"/> F | ___/___/_____              |                |                  |                          |
| 0172                               | ___/___/___                  | <input type="checkbox"/> Y <input type="checkbox"/> N |           |         |            | <input type="checkbox"/> M <input type="checkbox"/> F | ___/___/_____              |                |                  |                          |
| 0173                               | ___/___/___                  | <input type="checkbox"/> Y <input type="checkbox"/> N |           |         |            | <input type="checkbox"/> M <input type="checkbox"/> F | ___/___/_____              |                |                  |                          |
| 0174                               | ___/___/___                  | <input type="checkbox"/> Y <input type="checkbox"/> N |           |         |            | <input type="checkbox"/> M <input type="checkbox"/> F | ___/___/_____              |                |                  |                          |
| 0175                               | ___/___/___                  | <input type="checkbox"/> Y <input type="checkbox"/> N |           |         |            | <input type="checkbox"/> M <input type="checkbox"/> F | ___/___/_____              |                |                  |                          |
| 0176                               | ___/___/___                  | <input type="checkbox"/> Y <input type="checkbox"/> N |           |         |            | <input type="checkbox"/> M <input type="checkbox"/> F | ___/___/_____              |                |                  |                          |
| 0177                               | ___/___/___                  | <input type="checkbox"/> Y <input type="checkbox"/> N |           |         |            | <input type="checkbox"/> M <input type="checkbox"/> F | ___/___/_____              |                |                  |                          |
| 0178                               | ___/___/___                  | <input type="checkbox"/> Y <input type="checkbox"/> N |           |         |            | <input type="checkbox"/> M <input type="checkbox"/> F | ___/___/_____              |                |                  |                          |

# HTN Enrollment Registry: Site Number

V1.2 27 January 2020

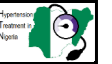

| Patient Identification Information |                              |                                                       |           |         |            |                                                       |                            |                |                  |                          |
|------------------------------------|------------------------------|-------------------------------------------------------|-----------|---------|------------|-------------------------------------------------------|----------------------------|----------------|------------------|--------------------------|
| Patient ID#                        | Registration Date (DD/MM/YY) | New HTN Diagnosis                                     | Unique ID | Surname | First Name | Gender                                                | Date of Birth (DD/MM/YYYY) | Phone Number 1 | Next of Kin Name | Next of Kin Phone Number |
| 0179                               | ___/___/___                  | <input type="checkbox"/> Y <input type="checkbox"/> N |           |         |            | <input type="checkbox"/> M <input type="checkbox"/> F | ___/___/_____              |                |                  |                          |
| 0180                               | ___/___/___                  | <input type="checkbox"/> Y <input type="checkbox"/> N |           |         |            | <input type="checkbox"/> M <input type="checkbox"/> F | ___/___/_____              |                |                  |                          |
| 0181                               | ___/___/___                  | <input type="checkbox"/> Y <input type="checkbox"/> N |           |         |            | <input type="checkbox"/> M <input type="checkbox"/> F | ___/___/_____              |                |                  |                          |
| 0182                               | ___/___/___                  | <input type="checkbox"/> Y <input type="checkbox"/> N |           |         |            | <input type="checkbox"/> M <input type="checkbox"/> F | ___/___/_____              |                |                  |                          |
| 0183                               | ___/___/___                  | <input type="checkbox"/> Y <input type="checkbox"/> N |           |         |            | <input type="checkbox"/> M <input type="checkbox"/> F | ___/___/_____              |                |                  |                          |
| 0184                               | ___/___/___                  | <input type="checkbox"/> Y <input type="checkbox"/> N |           |         |            | <input type="checkbox"/> M <input type="checkbox"/> F | ___/___/_____              |                |                  |                          |
| 0185                               | ___/___/___                  | <input type="checkbox"/> Y <input type="checkbox"/> N |           |         |            | <input type="checkbox"/> M <input type="checkbox"/> F | ___/___/_____              |                |                  |                          |
| 0186                               | ___/___/___                  | <input type="checkbox"/> Y <input type="checkbox"/> N |           |         |            | <input type="checkbox"/> M <input type="checkbox"/> F | ___/___/_____              |                |                  |                          |
| 0187                               | ___/___/___                  | <input type="checkbox"/> Y <input type="checkbox"/> N |           |         |            | <input type="checkbox"/> M <input type="checkbox"/> F | ___/___/_____              |                |                  |                          |
| 0188                               | ___/___/___                  | <input type="checkbox"/> Y <input type="checkbox"/> N |           |         |            | <input type="checkbox"/> M <input type="checkbox"/> F | ___/___/_____              |                |                  |                          |
| 0189                               | ___/___/___                  | <input type="checkbox"/> Y <input type="checkbox"/> N |           |         |            | <input type="checkbox"/> M <input type="checkbox"/> F | ___/___/_____              |                |                  |                          |
| 0190                               | ___/___/___                  | <input type="checkbox"/> Y <input type="checkbox"/> N |           |         |            | <input type="checkbox"/> M <input type="checkbox"/> F | ___/___/_____              |                |                  |                          |
| 0191                               | ___/___/___                  | <input type="checkbox"/> Y <input type="checkbox"/> N |           |         |            | <input type="checkbox"/> M <input type="checkbox"/> F | ___/___/_____              |                |                  |                          |
| 0192                               | ___/___/___                  | <input type="checkbox"/> Y <input type="checkbox"/> N |           |         |            | <input type="checkbox"/> M <input type="checkbox"/> F | ___/___/_____              |                |                  |                          |
| 0193                               | ___/___/___                  | <input type="checkbox"/> Y <input type="checkbox"/> N |           |         |            | <input type="checkbox"/> M <input type="checkbox"/> F | ___/___/_____              |                |                  |                          |
| 0194                               | ___/___/___                  | <input type="checkbox"/> Y <input type="checkbox"/> N |           |         |            | <input type="checkbox"/> M <input type="checkbox"/> F | ___/___/_____              |                |                  |                          |
| 0195                               | ___/___/___                  | <input type="checkbox"/> Y <input type="checkbox"/> N |           |         |            | <input type="checkbox"/> M <input type="checkbox"/> F | ___/___/_____              |                |                  |                          |
| 0196                               | ___/___/___                  | <input type="checkbox"/> Y <input type="checkbox"/> N |           |         |            | <input type="checkbox"/> M <input type="checkbox"/> F | ___/___/_____              |                |                  |                          |
| 0197                               | ___/___/___                  | <input type="checkbox"/> Y <input type="checkbox"/> N |           |         |            | <input type="checkbox"/> M <input type="checkbox"/> F | ___/___/_____              |                |                  |                          |
| 0198                               | ___/___/___                  | <input type="checkbox"/> Y <input type="checkbox"/> N |           |         |            | <input type="checkbox"/> M <input type="checkbox"/> F | ___/___/_____              |                |                  |                          |
| 0199                               | ___/___/___                  | <input type="checkbox"/> Y <input type="checkbox"/> N |           |         |            | <input type="checkbox"/> M <input type="checkbox"/> F | ___/___/_____              |                |                  |                          |
| 0200                               | ___/___/___                  | <input type="checkbox"/> Y <input type="checkbox"/> N |           |         |            | <input type="checkbox"/> M <input type="checkbox"/> F | ___/___/_____              |                |                  |                          |
| 0201                               | ___/___/___                  | <input type="checkbox"/> Y <input type="checkbox"/> N |           |         |            | <input type="checkbox"/> M <input type="checkbox"/> F | ___/___/_____              |                |                  |                          |
| 0202                               | ___/___/___                  | <input type="checkbox"/> Y <input type="checkbox"/> N |           |         |            | <input type="checkbox"/> M <input type="checkbox"/> F | ___/___/_____              |                |                  |                          |
| 0203                               | ___/___/___                  | <input type="checkbox"/> Y <input type="checkbox"/> N |           |         |            | <input type="checkbox"/> M <input type="checkbox"/> F | ___/___/_____              |                |                  |                          |
| 0204                               | ___/___/___                  | <input type="checkbox"/> Y <input type="checkbox"/> N |           |         |            | <input type="checkbox"/> M <input type="checkbox"/> F | ___/___/_____              |                |                  |                          |
| 0205                               | ___/___/___                  | <input type="checkbox"/> Y <input type="checkbox"/> N |           |         |            | <input type="checkbox"/> M <input type="checkbox"/> F | ___/___/_____              |                |                  |                          |
| 0206                               | ___/___/___                  | <input type="checkbox"/> Y <input type="checkbox"/> N |           |         |            | <input type="checkbox"/> M <input type="checkbox"/> F | ___/___/_____              |                |                  |                          |
| 0207                               | ___/___/___                  | <input type="checkbox"/> Y <input type="checkbox"/> N |           |         |            | <input type="checkbox"/> M <input type="checkbox"/> F | ___/___/_____              |                |                  |                          |
| 0208                               | ___/___/___                  | <input type="checkbox"/> Y <input type="checkbox"/> N |           |         |            | <input type="checkbox"/> M <input type="checkbox"/> F | ___/___/_____              |                |                  |                          |
| 0209                               | ___/___/___                  | <input type="checkbox"/> Y <input type="checkbox"/> N |           |         |            | <input type="checkbox"/> M <input type="checkbox"/> F | ___/___/_____              |                |                  |                          |
| 0210                               | ___/___/___                  | <input type="checkbox"/> Y <input type="checkbox"/> N |           |         |            | <input type="checkbox"/> M <input type="checkbox"/> F | ___/___/_____              |                |                  |                          |
| 0211                               | ___/___/___                  | <input type="checkbox"/> Y <input type="checkbox"/> N |           |         |            | <input type="checkbox"/> M <input type="checkbox"/> F | ___/___/_____              |                |                  |                          |
| 0212                               | ___/___/___                  | <input type="checkbox"/> Y <input type="checkbox"/> N |           |         |            | <input type="checkbox"/> M <input type="checkbox"/> F | ___/___/_____              |                |                  |                          |
| 0213                               | ___/___/___                  | <input type="checkbox"/> Y <input type="checkbox"/> N |           |         |            | <input type="checkbox"/> M <input type="checkbox"/> F | ___/___/_____              |                |                  |                          |
| 0214                               | ___/___/___                  | <input type="checkbox"/> Y <input type="checkbox"/> N |           |         |            | <input type="checkbox"/> M <input type="checkbox"/> F | ___/___/_____              |                |                  |                          |

# HTN Enrollment Registry: Site Number

V1.2 27 January 2020



| Patient Identification Information |                              |                                                       |           |         |            |                                                       |                            |                |                  |                          |
|------------------------------------|------------------------------|-------------------------------------------------------|-----------|---------|------------|-------------------------------------------------------|----------------------------|----------------|------------------|--------------------------|
| Patient ID#                        | Registration Date (DD/MM/YY) | New HTN Diagnosis                                     | Unique ID | Surname | First Name | Gender                                                | Date of Birth (DD/MM/YYYY) | Phone Number 1 | Next of Kin Name | Next of Kin Phone Number |
| 0215                               | ___/___/___                  | <input type="checkbox"/> Y <input type="checkbox"/> N |           |         |            | <input type="checkbox"/> M <input type="checkbox"/> F | ___/___/_____              |                |                  |                          |
| 0216                               | ___/___/___                  | <input type="checkbox"/> Y <input type="checkbox"/> N |           |         |            | <input type="checkbox"/> M <input type="checkbox"/> F | ___/___/_____              |                |                  |                          |
| 0217                               | ___/___/___                  | <input type="checkbox"/> Y <input type="checkbox"/> N |           |         |            | <input type="checkbox"/> M <input type="checkbox"/> F | ___/___/_____              |                |                  |                          |
| 0218                               | ___/___/___                  | <input type="checkbox"/> Y <input type="checkbox"/> N |           |         |            | <input type="checkbox"/> M <input type="checkbox"/> F | ___/___/_____              |                |                  |                          |
| 0219                               | ___/___/___                  | <input type="checkbox"/> Y <input type="checkbox"/> N |           |         |            | <input type="checkbox"/> M <input type="checkbox"/> F | ___/___/_____              |                |                  |                          |
| 0220                               | ___/___/___                  | <input type="checkbox"/> Y <input type="checkbox"/> N |           |         |            | <input type="checkbox"/> M <input type="checkbox"/> F | ___/___/_____              |                |                  |                          |
| 0221                               | ___/___/___                  | <input type="checkbox"/> Y <input type="checkbox"/> N |           |         |            | <input type="checkbox"/> M <input type="checkbox"/> F | ___/___/_____              |                |                  |                          |
| 0222                               | ___/___/___                  | <input type="checkbox"/> Y <input type="checkbox"/> N |           |         |            | <input type="checkbox"/> M <input type="checkbox"/> F | ___/___/_____              |                |                  |                          |
| 0223                               | ___/___/___                  | <input type="checkbox"/> Y <input type="checkbox"/> N |           |         |            | <input type="checkbox"/> M <input type="checkbox"/> F | ___/___/_____              |                |                  |                          |
| 0224                               | ___/___/___                  | <input type="checkbox"/> Y <input type="checkbox"/> N |           |         |            | <input type="checkbox"/> M <input type="checkbox"/> F | ___/___/_____              |                |                  |                          |
| 0225                               | ___/___/___                  | <input type="checkbox"/> Y <input type="checkbox"/> N |           |         |            | <input type="checkbox"/> M <input type="checkbox"/> F | ___/___/_____              |                |                  |                          |
| 0226                               | ___/___/___                  | <input type="checkbox"/> Y <input type="checkbox"/> N |           |         |            | <input type="checkbox"/> M <input type="checkbox"/> F | ___/___/_____              |                |                  |                          |
| 0227                               | ___/___/___                  | <input type="checkbox"/> Y <input type="checkbox"/> N |           |         |            | <input type="checkbox"/> M <input type="checkbox"/> F | ___/___/_____              |                |                  |                          |
| 0228                               | ___/___/___                  | <input type="checkbox"/> Y <input type="checkbox"/> N |           |         |            | <input type="checkbox"/> M <input type="checkbox"/> F | ___/___/_____              |                |                  |                          |
| 0229                               | ___/___/___                  | <input type="checkbox"/> Y <input type="checkbox"/> N |           |         |            | <input type="checkbox"/> M <input type="checkbox"/> F | ___/___/_____              |                |                  |                          |
| 0230                               | ___/___/___                  | <input type="checkbox"/> Y <input type="checkbox"/> N |           |         |            | <input type="checkbox"/> M <input type="checkbox"/> F | ___/___/_____              |                |                  |                          |
| 0231                               | ___/___/___                  | <input type="checkbox"/> Y <input type="checkbox"/> N |           |         |            | <input type="checkbox"/> M <input type="checkbox"/> F | ___/___/_____              |                |                  |                          |
| 0232                               | ___/___/___                  | <input type="checkbox"/> Y <input type="checkbox"/> N |           |         |            | <input type="checkbox"/> M <input type="checkbox"/> F | ___/___/_____              |                |                  |                          |
| 0233                               | ___/___/___                  | <input type="checkbox"/> Y <input type="checkbox"/> N |           |         |            | <input type="checkbox"/> M <input type="checkbox"/> F | ___/___/_____              |                |                  |                          |
| 0234                               | ___/___/___                  | <input type="checkbox"/> Y <input type="checkbox"/> N |           |         |            | <input type="checkbox"/> M <input type="checkbox"/> F | ___/___/_____              |                |                  |                          |
| 0235                               | ___/___/___                  | <input type="checkbox"/> Y <input type="checkbox"/> N |           |         |            | <input type="checkbox"/> M <input type="checkbox"/> F | ___/___/_____              |                |                  |                          |
| 0236                               | ___/___/___                  | <input type="checkbox"/> Y <input type="checkbox"/> N |           |         |            | <input type="checkbox"/> M <input type="checkbox"/> F | ___/___/_____              |                |                  |                          |
| 0237                               | ___/___/___                  | <input type="checkbox"/> Y <input type="checkbox"/> N |           |         |            | <input type="checkbox"/> M <input type="checkbox"/> F | ___/___/_____              |                |                  |                          |
| 0238                               | ___/___/___                  | <input type="checkbox"/> Y <input type="checkbox"/> N |           |         |            | <input type="checkbox"/> M <input type="checkbox"/> F | ___/___/_____              |                |                  |                          |
| 0239                               | ___/___/___                  | <input type="checkbox"/> Y <input type="checkbox"/> N |           |         |            | <input type="checkbox"/> M <input type="checkbox"/> F | ___/___/_____              |                |                  |                          |
| 0240                               | ___/___/___                  | <input type="checkbox"/> Y <input type="checkbox"/> N |           |         |            | <input type="checkbox"/> M <input type="checkbox"/> F | ___/___/_____              |                |                  |                          |
| 0241                               | ___/___/___                  | <input type="checkbox"/> Y <input type="checkbox"/> N |           |         |            | <input type="checkbox"/> M <input type="checkbox"/> F | ___/___/_____              |                |                  |                          |
| 0242                               | ___/___/___                  | <input type="checkbox"/> Y <input type="checkbox"/> N |           |         |            | <input type="checkbox"/> M <input type="checkbox"/> F | ___/___/_____              |                |                  |                          |
| 0243                               | ___/___/___                  | <input type="checkbox"/> Y <input type="checkbox"/> N |           |         |            | <input type="checkbox"/> M <input type="checkbox"/> F | ___/___/_____              |                |                  |                          |
| 0244                               | ___/___/___                  | <input type="checkbox"/> Y <input type="checkbox"/> N |           |         |            | <input type="checkbox"/> M <input type="checkbox"/> F | ___/___/_____              |                |                  |                          |
| 0245                               | ___/___/___                  | <input type="checkbox"/> Y <input type="checkbox"/> N |           |         |            | <input type="checkbox"/> M <input type="checkbox"/> F | ___/___/_____              |                |                  |                          |
| 0246                               | ___/___/___                  | <input type="checkbox"/> Y <input type="checkbox"/> N |           |         |            | <input type="checkbox"/> M <input type="checkbox"/> F | ___/___/_____              |                |                  |                          |
| 0247                               | ___/___/___                  | <input type="checkbox"/> Y <input type="checkbox"/> N |           |         |            | <input type="checkbox"/> M <input type="checkbox"/> F | ___/___/_____              |                |                  |                          |
| 0248                               | ___/___/___                  | <input type="checkbox"/> Y <input type="checkbox"/> N |           |         |            | <input type="checkbox"/> M <input type="checkbox"/> F | ___/___/_____              |                |                  |                          |
| 0249                               | ___/___/___                  | <input type="checkbox"/> Y <input type="checkbox"/> N |           |         |            | <input type="checkbox"/> M <input type="checkbox"/> F | ___/___/_____              |                |                  |                          |
| 0250                               | ___/___/___                  | <input type="checkbox"/> Y <input type="checkbox"/> N |           |         |            | <input type="checkbox"/> M <input type="checkbox"/> F | ___/___/_____              |                |                  |                          |

# HTN Enrollment Registry: Site Number

V1.2 27 January 2020



| Patient Identification Information |                              |                                                       |           |         |            |                                                       |                            |                |                  |                          |
|------------------------------------|------------------------------|-------------------------------------------------------|-----------|---------|------------|-------------------------------------------------------|----------------------------|----------------|------------------|--------------------------|
| Patient ID#                        | Registration Date (DD/MM/YY) | New HTN Diagnosis                                     | Unique ID | Surname | First Name | Gender                                                | Date of Birth (DD/MM/YYYY) | Phone Number 1 | Next of Kin Name | Next of Kin Phone Number |
| 0251                               | ___/___/___                  | <input type="checkbox"/> Y <input type="checkbox"/> N |           |         |            | <input type="checkbox"/> M <input type="checkbox"/> F | ___/___/_____              |                |                  |                          |
| 0252                               | ___/___/___                  | <input type="checkbox"/> Y <input type="checkbox"/> N |           |         |            | <input type="checkbox"/> M <input type="checkbox"/> F | ___/___/_____              |                |                  |                          |
| 0253                               | ___/___/___                  | <input type="checkbox"/> Y <input type="checkbox"/> N |           |         |            | <input type="checkbox"/> M <input type="checkbox"/> F | ___/___/_____              |                |                  |                          |
| 0254                               | ___/___/___                  | <input type="checkbox"/> Y <input type="checkbox"/> N |           |         |            | <input type="checkbox"/> M <input type="checkbox"/> F | ___/___/_____              |                |                  |                          |
| 0255                               | ___/___/___                  | <input type="checkbox"/> Y <input type="checkbox"/> N |           |         |            | <input type="checkbox"/> M <input type="checkbox"/> F | ___/___/_____              |                |                  |                          |
| 0256                               | ___/___/___                  | <input type="checkbox"/> Y <input type="checkbox"/> N |           |         |            | <input type="checkbox"/> M <input type="checkbox"/> F | ___/___/_____              |                |                  |                          |
| 0257                               | ___/___/___                  | <input type="checkbox"/> Y <input type="checkbox"/> N |           |         |            | <input type="checkbox"/> M <input type="checkbox"/> F | ___/___/_____              |                |                  |                          |
| 0258                               | ___/___/___                  | <input type="checkbox"/> Y <input type="checkbox"/> N |           |         |            | <input type="checkbox"/> M <input type="checkbox"/> F | ___/___/_____              |                |                  |                          |
| 0259                               | ___/___/___                  | <input type="checkbox"/> Y <input type="checkbox"/> N |           |         |            | <input type="checkbox"/> M <input type="checkbox"/> F | ___/___/_____              |                |                  |                          |
| 0260                               | ___/___/___                  | <input type="checkbox"/> Y <input type="checkbox"/> N |           |         |            | <input type="checkbox"/> M <input type="checkbox"/> F | ___/___/_____              |                |                  |                          |
| 0261                               | ___/___/___                  | <input type="checkbox"/> Y <input type="checkbox"/> N |           |         |            | <input type="checkbox"/> M <input type="checkbox"/> F | ___/___/_____              |                |                  |                          |
| 0262                               | ___/___/___                  | <input type="checkbox"/> Y <input type="checkbox"/> N |           |         |            | <input type="checkbox"/> M <input type="checkbox"/> F | ___/___/_____              |                |                  |                          |
| 0263                               | ___/___/___                  | <input type="checkbox"/> Y <input type="checkbox"/> N |           |         |            | <input type="checkbox"/> M <input type="checkbox"/> F | ___/___/_____              |                |                  |                          |
| 0264                               | ___/___/___                  | <input type="checkbox"/> Y <input type="checkbox"/> N |           |         |            | <input type="checkbox"/> M <input type="checkbox"/> F | ___/___/_____              |                |                  |                          |
| 0265                               | ___/___/___                  | <input type="checkbox"/> Y <input type="checkbox"/> N |           |         |            | <input type="checkbox"/> M <input type="checkbox"/> F | ___/___/_____              |                |                  |                          |
| 0266                               | ___/___/___                  | <input type="checkbox"/> Y <input type="checkbox"/> N |           |         |            | <input type="checkbox"/> M <input type="checkbox"/> F | ___/___/_____              |                |                  |                          |
| 0267                               | ___/___/___                  | <input type="checkbox"/> Y <input type="checkbox"/> N |           |         |            | <input type="checkbox"/> M <input type="checkbox"/> F | ___/___/_____              |                |                  |                          |
| 0268                               | ___/___/___                  | <input type="checkbox"/> Y <input type="checkbox"/> N |           |         |            | <input type="checkbox"/> M <input type="checkbox"/> F | ___/___/_____              |                |                  |                          |
| 0269                               | ___/___/___                  | <input type="checkbox"/> Y <input type="checkbox"/> N |           |         |            | <input type="checkbox"/> M <input type="checkbox"/> F | ___/___/_____              |                |                  |                          |
| 0270                               | ___/___/___                  | <input type="checkbox"/> Y <input type="checkbox"/> N |           |         |            | <input type="checkbox"/> M <input type="checkbox"/> F | ___/___/_____              |                |                  |                          |
| 0271                               | ___/___/___                  | <input type="checkbox"/> Y <input type="checkbox"/> N |           |         |            | <input type="checkbox"/> M <input type="checkbox"/> F | ___/___/_____              |                |                  |                          |
| 0272                               | ___/___/___                  | <input type="checkbox"/> Y <input type="checkbox"/> N |           |         |            | <input type="checkbox"/> M <input type="checkbox"/> F | ___/___/_____              |                |                  |                          |
| 0273                               | ___/___/___                  | <input type="checkbox"/> Y <input type="checkbox"/> N |           |         |            | <input type="checkbox"/> M <input type="checkbox"/> F | ___/___/_____              |                |                  |                          |
| 0274                               | ___/___/___                  | <input type="checkbox"/> Y <input type="checkbox"/> N |           |         |            | <input type="checkbox"/> M <input type="checkbox"/> F | ___/___/_____              |                |                  |                          |
| 0275                               | ___/___/___                  | <input type="checkbox"/> Y <input type="checkbox"/> N |           |         |            | <input type="checkbox"/> M <input type="checkbox"/> F | ___/___/_____              |                |                  |                          |
| 0276                               | ___/___/___                  | <input type="checkbox"/> Y <input type="checkbox"/> N |           |         |            | <input type="checkbox"/> M <input type="checkbox"/> F | ___/___/_____              |                |                  |                          |
| 0277                               | ___/___/___                  | <input type="checkbox"/> Y <input type="checkbox"/> N |           |         |            | <input type="checkbox"/> M <input type="checkbox"/> F | ___/___/_____              |                |                  |                          |
| 0278                               | ___/___/___                  | <input type="checkbox"/> Y <input type="checkbox"/> N |           |         |            | <input type="checkbox"/> M <input type="checkbox"/> F | ___/___/_____              |                |                  |                          |
| 0279                               | ___/___/___                  | <input type="checkbox"/> Y <input type="checkbox"/> N |           |         |            | <input type="checkbox"/> M <input type="checkbox"/> F | ___/___/_____              |                |                  |                          |
| 0280                               | ___/___/___                  | <input type="checkbox"/> Y <input type="checkbox"/> N |           |         |            | <input type="checkbox"/> M <input type="checkbox"/> F | ___/___/_____              |                |                  |                          |
| 0281                               | ___/___/___                  | <input type="checkbox"/> Y <input type="checkbox"/> N |           |         |            | <input type="checkbox"/> M <input type="checkbox"/> F | ___/___/_____              |                |                  |                          |
| 0282                               | ___/___/___                  | <input type="checkbox"/> Y <input type="checkbox"/> N |           |         |            | <input type="checkbox"/> M <input type="checkbox"/> F | ___/___/_____              |                |                  |                          |
| 0283                               | ___/___/___                  | <input type="checkbox"/> Y <input type="checkbox"/> N |           |         |            | <input type="checkbox"/> M <input type="checkbox"/> F | ___/___/_____              |                |                  |                          |
| 0284                               | ___/___/___                  | <input type="checkbox"/> Y <input type="checkbox"/> N |           |         |            | <input type="checkbox"/> M <input type="checkbox"/> F | ___/___/_____              |                |                  |                          |
| 0285                               | ___/___/___                  | <input type="checkbox"/> Y <input type="checkbox"/> N |           |         |            | <input type="checkbox"/> M <input type="checkbox"/> F | ___/___/_____              |                |                  |                          |
| 0286                               | ___/___/___                  | <input type="checkbox"/> Y <input type="checkbox"/> N |           |         |            | <input type="checkbox"/> M <input type="checkbox"/> F | ___/___/_____              |                |                  |                          |



# HTN Enrollment Registry: Site Number

V1.2 27 January 2020



| Patient Identification Information |                              |                                                       |           |         |            |                                                       |                            |                |                  |                          |
|------------------------------------|------------------------------|-------------------------------------------------------|-----------|---------|------------|-------------------------------------------------------|----------------------------|----------------|------------------|--------------------------|
| Patient ID#                        | Registration Date (DD/MM/YY) | New HTN Diagnosis                                     | Unique ID | Surname | First Name | Gender                                                | Date of Birth (DD/MM/YYYY) | Phone Number 1 | Next of Kin Name | Next of Kin Phone Number |
| 0287                               | ___/___/___                  | <input type="checkbox"/> Y <input type="checkbox"/> N |           |         |            | <input type="checkbox"/> M <input type="checkbox"/> F | ___/___/_____              |                |                  |                          |
| 0288                               | ___/___/___                  | <input type="checkbox"/> Y <input type="checkbox"/> N |           |         |            | <input type="checkbox"/> M <input type="checkbox"/> F | ___/___/_____              |                |                  |                          |
| 0289                               | ___/___/___                  | <input type="checkbox"/> Y <input type="checkbox"/> N |           |         |            | <input type="checkbox"/> M <input type="checkbox"/> F | ___/___/_____              |                |                  |                          |
| 0290                               | ___/___/___                  | <input type="checkbox"/> Y <input type="checkbox"/> N |           |         |            | <input type="checkbox"/> M <input type="checkbox"/> F | ___/___/_____              |                |                  |                          |
| 0291                               | ___/___/___                  | <input type="checkbox"/> Y <input type="checkbox"/> N |           |         |            | <input type="checkbox"/> M <input type="checkbox"/> F | ___/___/_____              |                |                  |                          |
| 0292                               | ___/___/___                  | <input type="checkbox"/> Y <input type="checkbox"/> N |           |         |            | <input type="checkbox"/> M <input type="checkbox"/> F | ___/___/_____              |                |                  |                          |
| 0293                               | ___/___/___                  | <input type="checkbox"/> Y <input type="checkbox"/> N |           |         |            | <input type="checkbox"/> M <input type="checkbox"/> F | ___/___/_____              |                |                  |                          |
| 0294                               | ___/___/___                  | <input type="checkbox"/> Y <input type="checkbox"/> N |           |         |            | <input type="checkbox"/> M <input type="checkbox"/> F | ___/___/_____              |                |                  |                          |
| 0295                               | ___/___/___                  | <input type="checkbox"/> Y <input type="checkbox"/> N |           |         |            | <input type="checkbox"/> M <input type="checkbox"/> F | ___/___/_____              |                |                  |                          |
| 0296                               | ___/___/___                  | <input type="checkbox"/> Y <input type="checkbox"/> N |           |         |            | <input type="checkbox"/> M <input type="checkbox"/> F | ___/___/_____              |                |                  |                          |
| 0297                               | ___/___/___                  | <input type="checkbox"/> Y <input type="checkbox"/> N |           |         |            | <input type="checkbox"/> M <input type="checkbox"/> F | ___/___/_____              |                |                  |                          |
| 0298                               | ___/___/___                  | <input type="checkbox"/> Y <input type="checkbox"/> N |           |         |            | <input type="checkbox"/> M <input type="checkbox"/> F | ___/___/_____              |                |                  |                          |
| 0299                               | ___/___/___                  | <input type="checkbox"/> Y <input type="checkbox"/> N |           |         |            | <input type="checkbox"/> M <input type="checkbox"/> F | ___/___/_____              |                |                  |                          |
| 0300                               | ___/___/___                  | <input type="checkbox"/> Y <input type="checkbox"/> N |           |         |            | <input type="checkbox"/> M <input type="checkbox"/> F | ___/___/_____              |                |                  |                          |
| 0301                               | ___/___/___                  | <input type="checkbox"/> Y <input type="checkbox"/> N |           |         |            | <input type="checkbox"/> M <input type="checkbox"/> F | ___/___/_____              |                |                  |                          |
| 0302                               | ___/___/___                  | <input type="checkbox"/> Y <input type="checkbox"/> N |           |         |            | <input type="checkbox"/> M <input type="checkbox"/> F | ___/___/_____              |                |                  |                          |
| 0303                               | ___/___/___                  | <input type="checkbox"/> Y <input type="checkbox"/> N |           |         |            | <input type="checkbox"/> M <input type="checkbox"/> F | ___/___/_____              |                |                  |                          |
| 0304                               | ___/___/___                  | <input type="checkbox"/> Y <input type="checkbox"/> N |           |         |            | <input type="checkbox"/> M <input type="checkbox"/> F | ___/___/_____              |                |                  |                          |
| 0305                               | ___/___/___                  | <input type="checkbox"/> Y <input type="checkbox"/> N |           |         |            | <input type="checkbox"/> M <input type="checkbox"/> F | ___/___/_____              |                |                  |                          |
| 0306                               | ___/___/___                  | <input type="checkbox"/> Y <input type="checkbox"/> N |           |         |            | <input type="checkbox"/> M <input type="checkbox"/> F | ___/___/_____              |                |                  |                          |
| 0307                               | ___/___/___                  | <input type="checkbox"/> Y <input type="checkbox"/> N |           |         |            | <input type="checkbox"/> M <input type="checkbox"/> F | ___/___/_____              |                |                  |                          |
| 0308                               | ___/___/___                  | <input type="checkbox"/> Y <input type="checkbox"/> N |           |         |            | <input type="checkbox"/> M <input type="checkbox"/> F | ___/___/_____              |                |                  |                          |
| 0309                               | ___/___/___                  | <input type="checkbox"/> Y <input type="checkbox"/> N |           |         |            | <input type="checkbox"/> M <input type="checkbox"/> F | ___/___/_____              |                |                  |                          |
| 0310                               | ___/___/___                  | <input type="checkbox"/> Y <input type="checkbox"/> N |           |         |            | <input type="checkbox"/> M <input type="checkbox"/> F | ___/___/_____              |                |                  |                          |
| 0311                               | ___/___/___                  | <input type="checkbox"/> Y <input type="checkbox"/> N |           |         |            | <input type="checkbox"/> M <input type="checkbox"/> F | ___/___/_____              |                |                  |                          |
| 0312                               | ___/___/___                  | <input type="checkbox"/> Y <input type="checkbox"/> N |           |         |            | <input type="checkbox"/> M <input type="checkbox"/> F | ___/___/_____              |                |                  |                          |
| 0313                               | ___/___/___                  | <input type="checkbox"/> Y <input type="checkbox"/> N |           |         |            | <input type="checkbox"/> M <input type="checkbox"/> F | ___/___/_____              |                |                  |                          |
| 0314                               | ___/___/___                  | <input type="checkbox"/> Y <input type="checkbox"/> N |           |         |            | <input type="checkbox"/> M <input type="checkbox"/> F | ___/___/_____              |                |                  |                          |
| 0315                               | ___/___/___                  | <input type="checkbox"/> Y <input type="checkbox"/> N |           |         |            | <input type="checkbox"/> M <input type="checkbox"/> F | ___/___/_____              |                |                  |                          |
| 0316                               | ___/___/___                  | <input type="checkbox"/> Y <input type="checkbox"/> N |           |         |            | <input type="checkbox"/> M <input type="checkbox"/> F | ___/___/_____              |                |                  |                          |
| 0317                               | ___/___/___                  | <input type="checkbox"/> Y <input type="checkbox"/> N |           |         |            | <input type="checkbox"/> M <input type="checkbox"/> F | ___/___/_____              |                |                  |                          |
| 0318                               | ___/___/___                  | <input type="checkbox"/> Y <input type="checkbox"/> N |           |         |            | <input type="checkbox"/> M <input type="checkbox"/> F | ___/___/_____              |                |                  |                          |
| 0319                               | ___/___/___                  | <input type="checkbox"/> Y <input type="checkbox"/> N |           |         |            | <input type="checkbox"/> M <input type="checkbox"/> F | ___/___/_____              |                |                  |                          |
| 0320                               | ___/___/___                  | <input type="checkbox"/> Y <input type="checkbox"/> N |           |         |            | <input type="checkbox"/> M <input type="checkbox"/> F | ___/___/_____              |                |                  |                          |
| 0321                               | ___/___/___                  | <input type="checkbox"/> Y <input type="checkbox"/> N |           |         |            | <input type="checkbox"/> M <input type="checkbox"/> F | ___/___/_____              |                |                  |                          |
| 0322                               | ___/___/___                  | <input type="checkbox"/> Y <input type="checkbox"/> N |           |         |            | <input type="checkbox"/> M <input type="checkbox"/> F | ___/___/_____              |                |                  |                          |

# HTN Enrollment Registry: Site Number

V1.2 27 January 2020



| Patient Identification Information |                              |                                                       |           |         |            |                                                       |                            |                |                  |                          |
|------------------------------------|------------------------------|-------------------------------------------------------|-----------|---------|------------|-------------------------------------------------------|----------------------------|----------------|------------------|--------------------------|
| Patient ID#                        | Registration Date (DD/MM/YY) | New HTN Diagnosis                                     | Unique ID | Surname | First Name | Gender                                                | Date of Birth (DD/MM/YYYY) | Phone Number 1 | Next of Kin Name | Next of Kin Phone Number |
| 0323                               | ___/___/___                  | <input type="checkbox"/> Y <input type="checkbox"/> N |           |         |            | <input type="checkbox"/> M <input type="checkbox"/> F | ___/___/_____              |                |                  |                          |
| 0324                               | ___/___/___                  | <input type="checkbox"/> Y <input type="checkbox"/> N |           |         |            | <input type="checkbox"/> M <input type="checkbox"/> F | ___/___/_____              |                |                  |                          |
| 0325                               | ___/___/___                  | <input type="checkbox"/> Y <input type="checkbox"/> N |           |         |            | <input type="checkbox"/> M <input type="checkbox"/> F | ___/___/_____              |                |                  |                          |
| 0326                               | ___/___/___                  | <input type="checkbox"/> Y <input type="checkbox"/> N |           |         |            | <input type="checkbox"/> M <input type="checkbox"/> F | ___/___/_____              |                |                  |                          |
| 0327                               | ___/___/___                  | <input type="checkbox"/> Y <input type="checkbox"/> N |           |         |            | <input type="checkbox"/> M <input type="checkbox"/> F | ___/___/_____              |                |                  |                          |
| 0328                               | ___/___/___                  | <input type="checkbox"/> Y <input type="checkbox"/> N |           |         |            | <input type="checkbox"/> M <input type="checkbox"/> F | ___/___/_____              |                |                  |                          |
| 0329                               | ___/___/___                  | <input type="checkbox"/> Y <input type="checkbox"/> N |           |         |            | <input type="checkbox"/> M <input type="checkbox"/> F | ___/___/_____              |                |                  |                          |
| 0330                               | ___/___/___                  | <input type="checkbox"/> Y <input type="checkbox"/> N |           |         |            | <input type="checkbox"/> M <input type="checkbox"/> F | ___/___/_____              |                |                  |                          |
| 0331                               | ___/___/___                  | <input type="checkbox"/> Y <input type="checkbox"/> N |           |         |            | <input type="checkbox"/> M <input type="checkbox"/> F | ___/___/_____              |                |                  |                          |
| 0332                               | ___/___/___                  | <input type="checkbox"/> Y <input type="checkbox"/> N |           |         |            | <input type="checkbox"/> M <input type="checkbox"/> F | ___/___/_____              |                |                  |                          |
| 0333                               | ___/___/___                  | <input type="checkbox"/> Y <input type="checkbox"/> N |           |         |            | <input type="checkbox"/> M <input type="checkbox"/> F | ___/___/_____              |                |                  |                          |
| 0334                               | ___/___/___                  | <input type="checkbox"/> Y <input type="checkbox"/> N |           |         |            | <input type="checkbox"/> M <input type="checkbox"/> F | ___/___/_____              |                |                  |                          |
| 0335                               | ___/___/___                  | <input type="checkbox"/> Y <input type="checkbox"/> N |           |         |            | <input type="checkbox"/> M <input type="checkbox"/> F | ___/___/_____              |                |                  |                          |
| 0336                               | ___/___/___                  | <input type="checkbox"/> Y <input type="checkbox"/> N |           |         |            | <input type="checkbox"/> M <input type="checkbox"/> F | ___/___/_____              |                |                  |                          |
| 0337                               | ___/___/___                  | <input type="checkbox"/> Y <input type="checkbox"/> N |           |         |            | <input type="checkbox"/> M <input type="checkbox"/> F | ___/___/_____              |                |                  |                          |
| 0338                               | ___/___/___                  | <input type="checkbox"/> Y <input type="checkbox"/> N |           |         |            | <input type="checkbox"/> M <input type="checkbox"/> F | ___/___/_____              |                |                  |                          |
| 0339                               | ___/___/___                  | <input type="checkbox"/> Y <input type="checkbox"/> N |           |         |            | <input type="checkbox"/> M <input type="checkbox"/> F | ___/___/_____              |                |                  |                          |
| 0340                               | ___/___/___                  | <input type="checkbox"/> Y <input type="checkbox"/> N |           |         |            | <input type="checkbox"/> M <input type="checkbox"/> F | ___/___/_____              |                |                  |                          |
| 0341                               | ___/___/___                  | <input type="checkbox"/> Y <input type="checkbox"/> N |           |         |            | <input type="checkbox"/> M <input type="checkbox"/> F | ___/___/_____              |                |                  |                          |
| 0342                               | ___/___/___                  | <input type="checkbox"/> Y <input type="checkbox"/> N |           |         |            | <input type="checkbox"/> M <input type="checkbox"/> F | ___/___/_____              |                |                  |                          |
| 0343                               | ___/___/___                  | <input type="checkbox"/> Y <input type="checkbox"/> N |           |         |            | <input type="checkbox"/> M <input type="checkbox"/> F | ___/___/_____              |                |                  |                          |
| 0344                               | ___/___/___                  | <input type="checkbox"/> Y <input type="checkbox"/> N |           |         |            | <input type="checkbox"/> M <input type="checkbox"/> F | ___/___/_____              |                |                  |                          |
| 0345                               | ___/___/___                  | <input type="checkbox"/> Y <input type="checkbox"/> N |           |         |            | <input type="checkbox"/> M <input type="checkbox"/> F | ___/___/_____              |                |                  |                          |
| 0346                               | ___/___/___                  | <input type="checkbox"/> Y <input type="checkbox"/> N |           |         |            | <input type="checkbox"/> M <input type="checkbox"/> F | ___/___/_____              |                |                  |                          |
| 0347                               | ___/___/___                  | <input type="checkbox"/> Y <input type="checkbox"/> N |           |         |            | <input type="checkbox"/> M <input type="checkbox"/> F | ___/___/_____              |                |                  |                          |
| 0348                               | ___/___/___                  | <input type="checkbox"/> Y <input type="checkbox"/> N |           |         |            | <input type="checkbox"/> M <input type="checkbox"/> F | ___/___/_____              |                |                  |                          |
| 0349                               | ___/___/___                  | <input type="checkbox"/> Y <input type="checkbox"/> N |           |         |            | <input type="checkbox"/> M <input type="checkbox"/> F | ___/___/_____              |                |                  |                          |
| 0350                               | ___/___/___                  | <input type="checkbox"/> Y <input type="checkbox"/> N |           |         |            | <input type="checkbox"/> M <input type="checkbox"/> F | ___/___/_____              |                |                  |                          |
| 0351                               | ___/___/___                  | <input type="checkbox"/> Y <input type="checkbox"/> N |           |         |            | <input type="checkbox"/> M <input type="checkbox"/> F | ___/___/_____              |                |                  |                          |
| 0352                               | ___/___/___                  | <input type="checkbox"/> Y <input type="checkbox"/> N |           |         |            | <input type="checkbox"/> M <input type="checkbox"/> F | ___/___/_____              |                |                  |                          |
| 0353                               | ___/___/___                  | <input type="checkbox"/> Y <input type="checkbox"/> N |           |         |            | <input type="checkbox"/> M <input type="checkbox"/> F | ___/___/_____              |                |                  |                          |
| 0354                               | ___/___/___                  | <input type="checkbox"/> Y <input type="checkbox"/> N |           |         |            | <input type="checkbox"/> M <input type="checkbox"/> F | ___/___/_____              |                |                  |                          |
| 0355                               | ___/___/___                  | <input type="checkbox"/> Y <input type="checkbox"/> N |           |         |            | <input type="checkbox"/> M <input type="checkbox"/> F | ___/___/_____              |                |                  |                          |
| 0356                               | ___/___/___                  | <input type="checkbox"/> Y <input type="checkbox"/> N |           |         |            | <input type="checkbox"/> M <input type="checkbox"/> F | ___/___/_____              |                |                  |                          |
| 0357                               | ___/___/___                  | <input type="checkbox"/> Y <input type="checkbox"/> N |           |         |            | <input type="checkbox"/> M <input type="checkbox"/> F | ___/___/_____              |                |                  |                          |
| 0358                               | ___/___/___                  | <input type="checkbox"/> Y <input type="checkbox"/> N |           |         |            | <input type="checkbox"/> M <input type="checkbox"/> F | ___/___/_____              |                |                  |                          |
