# Supplementary material for: Hypertension Treatment in Nigeria (HTN) Program: rationale and design for a type 2 hybrid, effectiveness, and implementation interrupted time series trial
Source: PubMed Central journal article supplement (PMC9344662; doi:10.1186/s43058-022-00328-9), 2022-08-02
Supplement: 43058_2022_328_MOESM4_ESM.pdf [file 43058_2022_328_MOESM4_ESM.pdf]

**J. Side Effects, complete for each event reported**

| Date Event Started (DD/MM/YY) | Date Event Stopped (DD/MM/YY) | Effect Type              |                          |                          |                          |                          |                          | Required medical treatment<br>□Yes □No |
|-------------------------------|-------------------------------|--------------------------|--------------------------|--------------------------|--------------------------|--------------------------|--------------------------|----------------------------------------|
|                               |                               | Cough                    | Angioedema               | Acute kidney injury      | Electrolyte abnormality  | Syncope                  | Dizziness                |                                        |
| ___/___/___                   | ___/___/___                   | <input type="checkbox"/> | <input type="checkbox"/> | <input type="checkbox"/> | <input type="checkbox"/> | <input type="checkbox"/> | <input type="checkbox"/> | □Yes □No                               |
| ___/___/___                   | ___/___/___                   | <input type="checkbox"/> | <input type="checkbox"/> | <input type="checkbox"/> | <input type="checkbox"/> | <input type="checkbox"/> | <input type="checkbox"/> | □Yes □No                               |
| ___/___/___                   | ___/___/___                   | <input type="checkbox"/> | <input type="checkbox"/> | <input type="checkbox"/> | <input type="checkbox"/> | <input type="checkbox"/> | <input type="checkbox"/> | □Yes □No                               |
| ___/___/___                   | ___/___/___                   | <input type="checkbox"/> | <input type="checkbox"/> | <input type="checkbox"/> | <input type="checkbox"/> | <input type="checkbox"/> | <input type="checkbox"/> | □Yes □No                               |
| ___/___/___                   | ___/___/___                   | <input type="checkbox"/> | <input type="checkbox"/> | <input type="checkbox"/> | <input type="checkbox"/> | <input type="checkbox"/> | <input type="checkbox"/> | □Yes □No                               |
| ___/___/___                   | ___/___/___                   | <input type="checkbox"/> | <input type="checkbox"/> | <input type="checkbox"/> | <input type="checkbox"/> | <input type="checkbox"/> | <input type="checkbox"/> | □Yes □No                               |
| ___/___/___                   | ___/___/___                   | <input type="checkbox"/> | <input type="checkbox"/> | <input type="checkbox"/> | <input type="checkbox"/> | <input type="checkbox"/> | <input type="checkbox"/> | □Yes □No                               |
| ___/___/___                   | ___/___/___                   | <input type="checkbox"/> | <input type="checkbox"/> | <input type="checkbox"/> | <input type="checkbox"/> | <input type="checkbox"/> | <input type="checkbox"/> | □Yes □No                               |
| ___/___/___                   | ___/___/___                   | <input type="checkbox"/> | <input type="checkbox"/> | <input type="checkbox"/> | <input type="checkbox"/> | <input type="checkbox"/> | <input type="checkbox"/> | □Yes □No                               |
| ___/___/___                   | ___/___/___                   | <input type="checkbox"/> | <input type="checkbox"/> | <input type="checkbox"/> | <input type="checkbox"/> | <input type="checkbox"/> | <input type="checkbox"/> | □Yes □No                               |
| ___/___/___                   | ___/___/___                   | <input type="checkbox"/> | <input type="checkbox"/> | <input type="checkbox"/> | <input type="checkbox"/> | <input type="checkbox"/> | <input type="checkbox"/> | □Yes □No                               |
| ___/___/___                   | ___/___/___                   | <input type="checkbox"/> | <input type="checkbox"/> | <input type="checkbox"/> | <input type="checkbox"/> | <input type="checkbox"/> | <input type="checkbox"/> | □Yes □No                               |
| ___/___/___                   | ___/___/___                   | <input type="checkbox"/> | <input type="checkbox"/> | <input type="checkbox"/> | <input type="checkbox"/> | <input type="checkbox"/> | <input type="checkbox"/> | □Yes □No                               |
| ___/___/___                   | ___/___/___                   | <input type="checkbox"/> | <input type="checkbox"/> | <input type="checkbox"/> | <input type="checkbox"/> | <input type="checkbox"/> | <input type="checkbox"/> | □Yes □No                               |
| ___/___/___                   | ___/___/___                   | <input type="checkbox"/> | <input type="checkbox"/> | <input type="checkbox"/> | <input type="checkbox"/> | <input type="checkbox"/> | <input type="checkbox"/> | □Yes □No                               |
| ___/___/___                   | ___/___/___                   | <input type="checkbox"/> | <input type="checkbox"/> | <input type="checkbox"/> | <input type="checkbox"/> | <input type="checkbox"/> | <input type="checkbox"/> | □Yes □No                               |
| ___/___/___                   | ___/___/___                   | <input type="checkbox"/> | <input type="checkbox"/> | <input type="checkbox"/> | <input type="checkbox"/> | <input type="checkbox"/> | <input type="checkbox"/> | □Yes □No                               |
| ___/___/___                   | ___/___/___                   | <input type="checkbox"/> | <input type="checkbox"/> | <input type="checkbox"/> | <input type="checkbox"/> | <input type="checkbox"/> | <input type="checkbox"/> | □Yes □No                               |

**K. Serious Adverse Events**

| Date Event Started (DD/MM/YY) | Date Event Stopped (DD/MM/YY) | Event Description |
|-------------------------------|-------------------------------|-------------------|
| ___/___/___                   | ___/___/___                   |                   |
| ___/___/___                   | ___/___/___                   |                   |
| ___/___/___                   | ___/___/___                   |                   |
| ___/___/___                   | ___/___/___                   |                   |

**L. Referrals & Comments**

| Date (DD/MM/YY) | Referral | Comment (if referred, where and what for) |
|-----------------|----------|-------------------------------------------|
| ___/___/___     | □Yes □No |                                           |
| ___/___/___     | □Yes □No |                                           |
| ___/___/___     | □Yes □No |                                           |
| ___/___/___     | □Yes □No |                                           |
| ___/___/___     | □Yes □No |                                           |
| ___/___/___     | □Yes □No |                                           |
| ___/___/___     | □Yes □No |                                           |
| ___/___/___     | □Yes □No |                                           |

**J. Patient Status**

Active
  Dead (Date: \_\_\_/\_\_\_/\_\_\_)
  Migrated (Date: \_\_\_/\_\_\_/\_\_\_)
  Unresponsive (Date: \_\_\_/\_\_\_/\_\_\_)
  Inactive (Date: \_\_\_/\_\_\_/\_\_\_)

**HTN Treatment Card**

V1.2, 27 January 2020

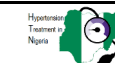
**A. Facility Information**

Council Area: \_\_\_\_\_ Health Center ID: \_\_\_\_\_  
 Registration date (DD/MM/YY): \_\_\_/\_\_\_/\_\_\_ PHC Name / Ward: \_\_\_\_\_

**B. Patient Identification Information**

Program ID#: \_\_\_\_\_ Surname: \_\_\_\_\_ First Name: \_\_\_\_\_  
 Unique ID #: \_\_\_\_\_ 1<sup>st</sup> Phone Number: \_\_\_\_\_  
 Next of Kin Name: \_\_\_\_\_ Next of Kin Phone Number: \_\_\_\_\_  
 Sex:  Male  Female Birth Date (DD/MM/YYYY): \_\_\_/\_\_\_/\_\_\_\_ Height: \_\_\_\_\_ cm  
 Education Level:  Never attended school  Primary School  Secondary School  High School  
 College/University  Professional Degree  Other: \_\_\_\_\_

**C. Diagnosis & Co-morbidity**

| Event/Condition                      | At registration          |                          |                          |                                                                     | During Program                                                                                                                                                                       |                           |
|--------------------------------------|--------------------------|--------------------------|--------------------------|---------------------------------------------------------------------|--------------------------------------------------------------------------------------------------------------------------------------------------------------------------------------|---------------------------|
|                                      | Yes                      | No                       | Unknown                  | Date, if known (MM/YY)                                              | New Event                                                                                                                                                                            | Date, if known (DD/MM/YY) |
| Hypertension diagnosis               | <input type="checkbox"/> | <input type="checkbox"/> | NA                       | ___/___                                                             | NA                                                                                                                                                                                   | NA                        |
| Diabetes mellitus diagnosis          | <input type="checkbox"/> | <input type="checkbox"/> | <input type="checkbox"/> | ___/___                                                             | <input type="checkbox"/>                                                                                                                                                             | ___/___/___               |
| Heart failure diagnosis              | <input type="checkbox"/> | <input type="checkbox"/> | <input type="checkbox"/> | ___/___                                                             | <input type="checkbox"/>                                                                                                                                                             | ___/___/___               |
| Chronic kidney disease diagnosis     | <input type="checkbox"/> | <input type="checkbox"/> | <input type="checkbox"/> | ___/___                                                             | <input type="checkbox"/>                                                                                                                                                             | ___/___/___               |
| Prior stroke                         | <input type="checkbox"/> | <input type="checkbox"/> | <input type="checkbox"/> | ___/___                                                             | <input type="checkbox"/>                                                                                                                                                             | ___/___/___               |
| Prior heart attack                   | <input type="checkbox"/> | <input type="checkbox"/> | <input type="checkbox"/> | ___/___                                                             | <input type="checkbox"/>                                                                                                                                                             | ___/___/___               |
| Angiotensin Receptor Blocker Allergy | <input type="checkbox"/> | <input type="checkbox"/> | <input type="checkbox"/> | ___/___                                                             | <input type="checkbox"/>                                                                                                                                                             | ___/___/___               |
| History of smoking/tobacco           | <input type="checkbox"/> | <input type="checkbox"/> | <input type="checkbox"/> | <input type="checkbox"/> Current<br><input type="checkbox"/> Former | <input type="checkbox"/> Less than 1x per week<br><input type="checkbox"/> Less than 1x per day<br><input type="checkbox"/> More than 1x per day                                     |                           |
| History of alcohol use               | <input type="checkbox"/> | <input type="checkbox"/> | <input type="checkbox"/> | <input type="checkbox"/> Current<br><input type="checkbox"/> Former | <input type="checkbox"/> Less than 1 bottle per week<br><input type="checkbox"/> Between 1 bottle per week and 1 bottle per day<br><input type="checkbox"/> More than 1 unit per day |                           |

**D. Pregnancy, complete among women only for each new pregnancy including current pregnancy at registration**

Pregnant at registration:  Yes  No Date of delivery or cessation: \_\_\_/\_\_\_/\_\_\_\_  
 Visit date with new pregnancy: \_\_\_/\_\_\_/\_\_\_\_ Date of delivery or cessation: \_\_\_/\_\_\_/\_\_\_\_  
 Visit date with new pregnancy: \_\_\_/\_\_\_/\_\_\_\_ Date of delivery or cessation: \_\_\_/\_\_\_/\_\_\_\_

**E. Hypertensive medications taken at baseline, complete one line per medication**

| How long has the drug been taken?                                                                                                | Drug                                                                                                                     | Dose                                                                                              |                                                                   | Other Drug                 | Stop Date (DD/MM/YY) |
|----------------------------------------------------------------------------------------------------------------------------------|--------------------------------------------------------------------------------------------------------------------------|---------------------------------------------------------------------------------------------------|-------------------------------------------------------------------|----------------------------|----------------------|
| <input type="checkbox"/> Less than 1 year<br><input type="checkbox"/> 1 to 5 years<br><input type="checkbox"/> More than 5 years | <input type="checkbox"/> Amlodipine<br><input type="checkbox"/> Losartan<br><input type="checkbox"/> Hydrochlorothiazide | <input type="checkbox"/> 5 mg<br><input type="checkbox"/> 10 mg<br><input type="checkbox"/> 25 mg | <input type="checkbox"/> 50 mg<br><input type="checkbox"/> 100 mg | Name: _____<br>Dose: _____ | ___/___/___          |
| <input type="checkbox"/> Less than 1 year<br><input type="checkbox"/> 1 to 5 years<br><input type="checkbox"/> More than 5 years | <input type="checkbox"/> Amlodipine<br><input type="checkbox"/> Losartan<br><input type="checkbox"/> Hydrochlorothiazide | <input type="checkbox"/> 5 mg<br><input type="checkbox"/> 10 mg<br><input type="checkbox"/> 25 mg | <input type="checkbox"/> 50 mg<br><input type="checkbox"/> 100 mg | Name: _____<br>Dose: _____ | ___/___/___          |
| <input type="checkbox"/> Less than 1 year<br><input type="checkbox"/> 1 to 5 years<br><input type="checkbox"/> More than 5 years | <input type="checkbox"/> Amlodipine<br><input type="checkbox"/> Losartan<br><input type="checkbox"/> Hydrochlorothiazide | <input type="checkbox"/> 5 mg<br><input type="checkbox"/> 10 mg<br><input type="checkbox"/> 25 mg | <input type="checkbox"/> 50 mg<br><input type="checkbox"/> 100 mg | Name: _____<br>Dose: _____ | ___/___/___          |
| <input type="checkbox"/> Less than 1 year<br><input type="checkbox"/> 1 to 5 years<br><input type="checkbox"/> More than 5 years | <input type="checkbox"/> Amlodipine<br><input type="checkbox"/> Losartan<br><input type="checkbox"/> Hydrochlorothiazide | <input type="checkbox"/> 5 mg<br><input type="checkbox"/> 10 mg<br><input type="checkbox"/> 25 mg | <input type="checkbox"/> 50 mg<br><input type="checkbox"/> 100 mg | Name: _____<br>Dose: _____ | ___/___/___          |
