# Supplementary material for: Hypertension Treatment in Nigeria (HTN) Program: rationale and design for a type 2 hybrid, effectiveness, and implementation interrupted time series trial
Source: PubMed Central journal article supplement (PMC9344662; doi:10.1186/s43058-022-00328-9), 2022-08-02
Supplement: 43058_2022_328_MOESM7_ESM.pdf [file 43058_2022_328_MOESM7_ESM.pdf]

| No.                                                                                                                                                                      | Question                                                                                        | Result                                                                                                                                                                                                                                                                                                                                                                      |                                                                                                                                                                                    |                                                           |                                                                                                                                                                                    |                                 |                                                                                                                                                                                    |                                                                                                                                                                                    |  |      |                                                                                                                                                                                                                                                                            |  |  |                                                                                                                                                                                    |  |  |
|--------------------------------------------------------------------------------------------------------------------------------------------------------------------------|-------------------------------------------------------------------------------------------------|-----------------------------------------------------------------------------------------------------------------------------------------------------------------------------------------------------------------------------------------------------------------------------------------------------------------------------------------------------------------------------|------------------------------------------------------------------------------------------------------------------------------------------------------------------------------------|-----------------------------------------------------------|------------------------------------------------------------------------------------------------------------------------------------------------------------------------------------|---------------------------------|------------------------------------------------------------------------------------------------------------------------------------------------------------------------------------|------------------------------------------------------------------------------------------------------------------------------------------------------------------------------------|--|------|----------------------------------------------------------------------------------------------------------------------------------------------------------------------------------------------------------------------------------------------------------------------------|--|--|------------------------------------------------------------------------------------------------------------------------------------------------------------------------------------|--|--|
| <b>Section 1: Facility Information</b>                                                                                                                                   |                                                                                                 |                                                                                                                                                                                                                                                                                                                                                                             |                                                                                                                                                                                    |                                                           |                                                                                                                                                                                    |                                 |                                                                                                                                                                                    |                                                                                                                                                                                    |  |      |                                                                                                                                                                                                                                                                            |  |  |                                                                                                                                                                                    |  |  |
| 001                                                                                                                                                                      | Facility number                                                                                 | <table border="1" style="display: inline-table; vertical-align: middle;"> <tr> <td style="width: 20px; height: 20px;"></td> </tr> </table> |                                                                                                                                                                                    |                                                           |                                                                                                                                                                                    |                                 |                                                                                                                                                                                    |                                                                                                                                                                                    |  |      |                                                                                                                                                                                                                                                                            |  |  |                                                                                                                                                                                    |  |  |
|                                                                                                                                                                          |                                                                                                 |                                                                                                                                                                                                                                                                                                                                                                             |                                                                                                                                                                                    |                                                           |                                                                                                                                                                                    |                                 |                                                                                                                                                                                    |                                                                                                                                                                                    |  |      |                                                                                                                                                                                                                                                                            |  |  |                                                                                                                                                                                    |  |  |
| 001a                                                                                                                                                                     | Date                                                                                            | Day                                                                                                                                                                                                                                                                                                                                                                         | <table border="1" style="display: inline-table; vertical-align: middle;"><tr><td style="width: 20px; height: 20px;"></td><td style="width: 20px; height: 20px;"></td></tr></table> |                                                           |                                                                                                                                                                                    | Month                           | <table border="1" style="display: inline-table; vertical-align: middle;"><tr><td style="width: 20px; height: 20px;"></td><td style="width: 20px; height: 20px;"></td></tr></table> |                                                                                                                                                                                    |  | Year | <table border="1" style="display: inline-table; vertical-align: middle;"><tr><td style="width: 20px; height: 20px;"></td><td style="width: 20px; height: 20px;"></td><td style="width: 20px; height: 20px;"></td><td style="width: 20px; height: 20px;"></td></tr></table> |  |  |                                                                                                                                                                                    |  |  |
|                                                                                                                                                                          |                                                                                                 |                                                                                                                                                                                                                                                                                                                                                                             |                                                                                                                                                                                    |                                                           |                                                                                                                                                                                    |                                 |                                                                                                                                                                                    |                                                                                                                                                                                    |  |      |                                                                                                                                                                                                                                                                            |  |  |                                                                                                                                                                                    |  |  |
|                                                                                                                                                                          |                                                                                                 |                                                                                                                                                                                                                                                                                                                                                                             |                                                                                                                                                                                    |                                                           |                                                                                                                                                                                    |                                 |                                                                                                                                                                                    |                                                                                                                                                                                    |  |      |                                                                                                                                                                                                                                                                            |  |  |                                                                                                                                                                                    |  |  |
|                                                                                                                                                                          |                                                                                                 |                                                                                                                                                                                                                                                                                                                                                                             |                                                                                                                                                                                    |                                                           |                                                                                                                                                                                    |                                 |                                                                                                                                                                                    |                                                                                                                                                                                    |  |      |                                                                                                                                                                                                                                                                            |  |  |                                                                                                                                                                                    |  |  |
| 001c                                                                                                                                                                     | Date of Last Visit                                                                              | Day                                                                                                                                                                                                                                                                                                                                                                         | <table border="1" style="display: inline-table; vertical-align: middle;"><tr><td style="width: 20px; height: 20px;"></td><td style="width: 20px; height: 20px;"></td></tr></table> |                                                           |                                                                                                                                                                                    | Month                           | <table border="1" style="display: inline-table; vertical-align: middle;"><tr><td style="width: 20px; height: 20px;"></td><td style="width: 20px; height: 20px;"></td></tr></table> |                                                                                                                                                                                    |  | Year | <table border="1" style="display: inline-table; vertical-align: middle;"><tr><td style="width: 20px; height: 20px;"></td><td style="width: 20px; height: 20px;"></td><td style="width: 20px; height: 20px;"></td><td style="width: 20px; height: 20px;"></td></tr></table> |  |  |                                                                                                                                                                                    |  |  |
|                                                                                                                                                                          |                                                                                                 |                                                                                                                                                                                                                                                                                                                                                                             |                                                                                                                                                                                    |                                                           |                                                                                                                                                                                    |                                 |                                                                                                                                                                                    |                                                                                                                                                                                    |  |      |                                                                                                                                                                                                                                                                            |  |  |                                                                                                                                                                                    |  |  |
|                                                                                                                                                                          |                                                                                                 |                                                                                                                                                                                                                                                                                                                                                                             |                                                                                                                                                                                    |                                                           |                                                                                                                                                                                    |                                 |                                                                                                                                                                                    |                                                                                                                                                                                    |  |      |                                                                                                                                                                                                                                                                            |  |  |                                                                                                                                                                                    |  |  |
|                                                                                                                                                                          |                                                                                                 |                                                                                                                                                                                                                                                                                                                                                                             |                                                                                                                                                                                    |                                                           |                                                                                                                                                                                    |                                 |                                                                                                                                                                                    |                                                                                                                                                                                    |  |      |                                                                                                                                                                                                                                                                            |  |  |                                                                                                                                                                                    |  |  |
| 001b                                                                                                                                                                     | Monitor Name                                                                                    | _____                                                                                                                                                                                                                                                                                                                                                                       |                                                                                                                                                                                    |                                                           |                                                                                                                                                                                    |                                 |                                                                                                                                                                                    |                                                                                                                                                                                    |  |      |                                                                                                                                                                                                                                                                            |  |  |                                                                                                                                                                                    |  |  |
| 003                                                                                                                                                                      | Name of facility                                                                                | _____                                                                                                                                                                                                                                                                                                                                                                       |                                                                                                                                                                                    |                                                           |                                                                                                                                                                                    |                                 |                                                                                                                                                                                    |                                                                                                                                                                                    |  |      |                                                                                                                                                                                                                                                                            |  |  |                                                                                                                                                                                    |  |  |
| <b>Section 2: Staffing</b>                                                                                                                                               |                                                                                                 |                                                                                                                                                                                                                                                                                                                                                                             |                                                                                                                                                                                    |                                                           |                                                                                                                                                                                    |                                 |                                                                                                                                                                                    |                                                                                                                                                                                    |  |      |                                                                                                                                                                                                                                                                            |  |  |                                                                                                                                                                                    |  |  |
| Count each staff member only once, on the basis of the highest technical or professional qualification.                                                                  |                                                                                                 | A. How many staff are currently working in this facility?                                                                                                                                                                                                                                                                                                                   | B. Of the total number, how many are part-time in this facility?                                                                                                                   | C. How many staff have newly joined since the last visit? | D. How many staff have left since the last visit?                                                                                                                                  | E. How many were trained today? |                                                                                                                                                                                    |                                                                                                                                                                                    |  |      |                                                                                                                                                                                                                                                                            |  |  |                                                                                                                                                                                    |  |  |
| 201                                                                                                                                                                      | Generalist medical doctors                                                                      | <table border="1" style="display: inline-table; vertical-align: middle;"><tr><td style="width: 20px; height: 20px;"></td><td style="width: 20px; height: 20px;"></td></tr></table>                                                                                                                                                                                          |                                                                                                                                                                                    |                                                           | <table border="1" style="display: inline-table; vertical-align: middle;"><tr><td style="width: 20px; height: 20px;"></td><td style="width: 20px; height: 20px;"></td></tr></table> |                                 |                                                                                                                                                                                    | <table border="1" style="display: inline-table; vertical-align: middle;"><tr><td style="width: 20px; height: 20px;"></td><td style="width: 20px; height: 20px;"></td></tr></table> |  |      | <table border="1" style="display: inline-table; vertical-align: middle;"><tr><td style="width: 20px; height: 20px;"></td><td style="width: 20px; height: 20px;"></td></tr></table>                                                                                         |  |  | <table border="1" style="display: inline-table; vertical-align: middle;"><tr><td style="width: 20px; height: 20px;"></td><td style="width: 20px; height: 20px;"></td></tr></table> |  |  |
|                                                                                                                                                                          |                                                                                                 |                                                                                                                                                                                                                                                                                                                                                                             |                                                                                                                                                                                    |                                                           |                                                                                                                                                                                    |                                 |                                                                                                                                                                                    |                                                                                                                                                                                    |  |      |                                                                                                                                                                                                                                                                            |  |  |                                                                                                                                                                                    |  |  |
|                                                                                                                                                                          |                                                                                                 |                                                                                                                                                                                                                                                                                                                                                                             |                                                                                                                                                                                    |                                                           |                                                                                                                                                                                    |                                 |                                                                                                                                                                                    |                                                                                                                                                                                    |  |      |                                                                                                                                                                                                                                                                            |  |  |                                                                                                                                                                                    |  |  |
|                                                                                                                                                                          |                                                                                                 |                                                                                                                                                                                                                                                                                                                                                                             |                                                                                                                                                                                    |                                                           |                                                                                                                                                                                    |                                 |                                                                                                                                                                                    |                                                                                                                                                                                    |  |      |                                                                                                                                                                                                                                                                            |  |  |                                                                                                                                                                                    |  |  |
|                                                                                                                                                                          |                                                                                                 |                                                                                                                                                                                                                                                                                                                                                                             |                                                                                                                                                                                    |                                                           |                                                                                                                                                                                    |                                 |                                                                                                                                                                                    |                                                                                                                                                                                    |  |      |                                                                                                                                                                                                                                                                            |  |  |                                                                                                                                                                                    |  |  |
|                                                                                                                                                                          |                                                                                                 |                                                                                                                                                                                                                                                                                                                                                                             |                                                                                                                                                                                    |                                                           |                                                                                                                                                                                    |                                 |                                                                                                                                                                                    |                                                                                                                                                                                    |  |      |                                                                                                                                                                                                                                                                            |  |  |                                                                                                                                                                                    |  |  |
| 202                                                                                                                                                                      | Specialist medical doctors                                                                      | <table border="1" style="display: inline-table; vertical-align: middle;"><tr><td style="width: 20px; height: 20px;"></td><td style="width: 20px; height: 20px;"></td></tr></table>                                                                                                                                                                                          |                                                                                                                                                                                    |                                                           | <table border="1" style="display: inline-table; vertical-align: middle;"><tr><td style="width: 20px; height: 20px;"></td><td style="width: 20px; height: 20px;"></td></tr></table> |                                 |                                                                                                                                                                                    | <table border="1" style="display: inline-table; vertical-align: middle;"><tr><td style="width: 20px; height: 20px;"></td><td style="width: 20px; height: 20px;"></td></tr></table> |  |      | <table border="1" style="display: inline-table; vertical-align: middle;"><tr><td style="width: 20px; height: 20px;"></td><td style="width: 20px; height: 20px;"></td></tr></table>                                                                                         |  |  | <table border="1" style="display: inline-table; vertical-align: middle;"><tr><td style="width: 20px; height: 20px;"></td><td style="width: 20px; height: 20px;"></td></tr></table> |  |  |
|                                                                                                                                                                          |                                                                                                 |                                                                                                                                                                                                                                                                                                                                                                             |                                                                                                                                                                                    |                                                           |                                                                                                                                                                                    |                                 |                                                                                                                                                                                    |                                                                                                                                                                                    |  |      |                                                                                                                                                                                                                                                                            |  |  |                                                                                                                                                                                    |  |  |
|                                                                                                                                                                          |                                                                                                 |                                                                                                                                                                                                                                                                                                                                                                             |                                                                                                                                                                                    |                                                           |                                                                                                                                                                                    |                                 |                                                                                                                                                                                    |                                                                                                                                                                                    |  |      |                                                                                                                                                                                                                                                                            |  |  |                                                                                                                                                                                    |  |  |
|                                                                                                                                                                          |                                                                                                 |                                                                                                                                                                                                                                                                                                                                                                             |                                                                                                                                                                                    |                                                           |                                                                                                                                                                                    |                                 |                                                                                                                                                                                    |                                                                                                                                                                                    |  |      |                                                                                                                                                                                                                                                                            |  |  |                                                                                                                                                                                    |  |  |
|                                                                                                                                                                          |                                                                                                 |                                                                                                                                                                                                                                                                                                                                                                             |                                                                                                                                                                                    |                                                           |                                                                                                                                                                                    |                                 |                                                                                                                                                                                    |                                                                                                                                                                                    |  |      |                                                                                                                                                                                                                                                                            |  |  |                                                                                                                                                                                    |  |  |
|                                                                                                                                                                          |                                                                                                 |                                                                                                                                                                                                                                                                                                                                                                             |                                                                                                                                                                                    |                                                           |                                                                                                                                                                                    |                                 |                                                                                                                                                                                    |                                                                                                                                                                                    |  |      |                                                                                                                                                                                                                                                                            |  |  |                                                                                                                                                                                    |  |  |
| 203                                                                                                                                                                      | Non-physician clinicians / paramedical professionals                                            | <table border="1" style="display: inline-table; vertical-align: middle;"><tr><td style="width: 20px; height: 20px;"></td><td style="width: 20px; height: 20px;"></td></tr></table>                                                                                                                                                                                          |                                                                                                                                                                                    |                                                           | <table border="1" style="display: inline-table; vertical-align: middle;"><tr><td style="width: 20px; height: 20px;"></td><td style="width: 20px; height: 20px;"></td></tr></table> |                                 |                                                                                                                                                                                    | <table border="1" style="display: inline-table; vertical-align: middle;"><tr><td style="width: 20px; height: 20px;"></td><td style="width: 20px; height: 20px;"></td></tr></table> |  |      | <table border="1" style="display: inline-table; vertical-align: middle;"><tr><td style="width: 20px; height: 20px;"></td><td style="width: 20px; height: 20px;"></td></tr></table>                                                                                         |  |  | <table border="1" style="display: inline-table; vertical-align: middle;"><tr><td style="width: 20px; height: 20px;"></td><td style="width: 20px; height: 20px;"></td></tr></table> |  |  |
|                                                                                                                                                                          |                                                                                                 |                                                                                                                                                                                                                                                                                                                                                                             |                                                                                                                                                                                    |                                                           |                                                                                                                                                                                    |                                 |                                                                                                                                                                                    |                                                                                                                                                                                    |  |      |                                                                                                                                                                                                                                                                            |  |  |                                                                                                                                                                                    |  |  |
|                                                                                                                                                                          |                                                                                                 |                                                                                                                                                                                                                                                                                                                                                                             |                                                                                                                                                                                    |                                                           |                                                                                                                                                                                    |                                 |                                                                                                                                                                                    |                                                                                                                                                                                    |  |      |                                                                                                                                                                                                                                                                            |  |  |                                                                                                                                                                                    |  |  |
|                                                                                                                                                                          |                                                                                                 |                                                                                                                                                                                                                                                                                                                                                                             |                                                                                                                                                                                    |                                                           |                                                                                                                                                                                    |                                 |                                                                                                                                                                                    |                                                                                                                                                                                    |  |      |                                                                                                                                                                                                                                                                            |  |  |                                                                                                                                                                                    |  |  |
|                                                                                                                                                                          |                                                                                                 |                                                                                                                                                                                                                                                                                                                                                                             |                                                                                                                                                                                    |                                                           |                                                                                                                                                                                    |                                 |                                                                                                                                                                                    |                                                                                                                                                                                    |  |      |                                                                                                                                                                                                                                                                            |  |  |                                                                                                                                                                                    |  |  |
|                                                                                                                                                                          |                                                                                                 |                                                                                                                                                                                                                                                                                                                                                                             |                                                                                                                                                                                    |                                                           |                                                                                                                                                                                    |                                 |                                                                                                                                                                                    |                                                                                                                                                                                    |  |      |                                                                                                                                                                                                                                                                            |  |  |                                                                                                                                                                                    |  |  |
| 204                                                                                                                                                                      | Nursing professionals                                                                           | <table border="1" style="display: inline-table; vertical-align: middle;"><tr><td style="width: 20px; height: 20px;"></td><td style="width: 20px; height: 20px;"></td></tr></table>                                                                                                                                                                                          |                                                                                                                                                                                    |                                                           | <table border="1" style="display: inline-table; vertical-align: middle;"><tr><td style="width: 20px; height: 20px;"></td><td style="width: 20px; height: 20px;"></td></tr></table> |                                 |                                                                                                                                                                                    | <table border="1" style="display: inline-table; vertical-align: middle;"><tr><td style="width: 20px; height: 20px;"></td><td style="width: 20px; height: 20px;"></td></tr></table> |  |      | <table border="1" style="display: inline-table; vertical-align: middle;"><tr><td style="width: 20px; height: 20px;"></td><td style="width: 20px; height: 20px;"></td></tr></table>                                                                                         |  |  | <table border="1" style="display: inline-table; vertical-align: middle;"><tr><td style="width: 20px; height: 20px;"></td><td style="width: 20px; height: 20px;"></td></tr></table> |  |  |
|                                                                                                                                                                          |                                                                                                 |                                                                                                                                                                                                                                                                                                                                                                             |                                                                                                                                                                                    |                                                           |                                                                                                                                                                                    |                                 |                                                                                                                                                                                    |                                                                                                                                                                                    |  |      |                                                                                                                                                                                                                                                                            |  |  |                                                                                                                                                                                    |  |  |
|                                                                                                                                                                          |                                                                                                 |                                                                                                                                                                                                                                                                                                                                                                             |                                                                                                                                                                                    |                                                           |                                                                                                                                                                                    |                                 |                                                                                                                                                                                    |                                                                                                                                                                                    |  |      |                                                                                                                                                                                                                                                                            |  |  |                                                                                                                                                                                    |  |  |
|                                                                                                                                                                          |                                                                                                 |                                                                                                                                                                                                                                                                                                                                                                             |                                                                                                                                                                                    |                                                           |                                                                                                                                                                                    |                                 |                                                                                                                                                                                    |                                                                                                                                                                                    |  |      |                                                                                                                                                                                                                                                                            |  |  |                                                                                                                                                                                    |  |  |
|                                                                                                                                                                          |                                                                                                 |                                                                                                                                                                                                                                                                                                                                                                             |                                                                                                                                                                                    |                                                           |                                                                                                                                                                                    |                                 |                                                                                                                                                                                    |                                                                                                                                                                                    |  |      |                                                                                                                                                                                                                                                                            |  |  |                                                                                                                                                                                    |  |  |
|                                                                                                                                                                          |                                                                                                 |                                                                                                                                                                                                                                                                                                                                                                             |                                                                                                                                                                                    |                                                           |                                                                                                                                                                                    |                                 |                                                                                                                                                                                    |                                                                                                                                                                                    |  |      |                                                                                                                                                                                                                                                                            |  |  |                                                                                                                                                                                    |  |  |
| 208                                                                                                                                                                      | Pharmacists                                                                                     | <table border="1" style="display: inline-table; vertical-align: middle;"><tr><td style="width: 20px; height: 20px;"></td><td style="width: 20px; height: 20px;"></td></tr></table>                                                                                                                                                                                          |                                                                                                                                                                                    |                                                           | <table border="1" style="display: inline-table; vertical-align: middle;"><tr><td style="width: 20px; height: 20px;"></td><td style="width: 20px; height: 20px;"></td></tr></table> |                                 |                                                                                                                                                                                    | <table border="1" style="display: inline-table; vertical-align: middle;"><tr><td style="width: 20px; height: 20px;"></td><td style="width: 20px; height: 20px;"></td></tr></table> |  |      | <table border="1" style="display: inline-table; vertical-align: middle;"><tr><td style="width: 20px; height: 20px;"></td><td style="width: 20px; height: 20px;"></td></tr></table>                                                                                         |  |  | <table border="1" style="display: inline-table; vertical-align: middle;"><tr><td style="width: 20px; height: 20px;"></td><td style="width: 20px; height: 20px;"></td></tr></table> |  |  |
|                                                                                                                                                                          |                                                                                                 |                                                                                                                                                                                                                                                                                                                                                                             |                                                                                                                                                                                    |                                                           |                                                                                                                                                                                    |                                 |                                                                                                                                                                                    |                                                                                                                                                                                    |  |      |                                                                                                                                                                                                                                                                            |  |  |                                                                                                                                                                                    |  |  |
|                                                                                                                                                                          |                                                                                                 |                                                                                                                                                                                                                                                                                                                                                                             |                                                                                                                                                                                    |                                                           |                                                                                                                                                                                    |                                 |                                                                                                                                                                                    |                                                                                                                                                                                    |  |      |                                                                                                                                                                                                                                                                            |  |  |                                                                                                                                                                                    |  |  |
|                                                                                                                                                                          |                                                                                                 |                                                                                                                                                                                                                                                                                                                                                                             |                                                                                                                                                                                    |                                                           |                                                                                                                                                                                    |                                 |                                                                                                                                                                                    |                                                                                                                                                                                    |  |      |                                                                                                                                                                                                                                                                            |  |  |                                                                                                                                                                                    |  |  |
|                                                                                                                                                                          |                                                                                                 |                                                                                                                                                                                                                                                                                                                                                                             |                                                                                                                                                                                    |                                                           |                                                                                                                                                                                    |                                 |                                                                                                                                                                                    |                                                                                                                                                                                    |  |      |                                                                                                                                                                                                                                                                            |  |  |                                                                                                                                                                                    |  |  |
|                                                                                                                                                                          |                                                                                                 |                                                                                                                                                                                                                                                                                                                                                                             |                                                                                                                                                                                    |                                                           |                                                                                                                                                                                    |                                 |                                                                                                                                                                                    |                                                                                                                                                                                    |  |      |                                                                                                                                                                                                                                                                            |  |  |                                                                                                                                                                                    |  |  |
| 211                                                                                                                                                                      | Laboratory technicians (medical and pathology)                                                  | <table border="1" style="display: inline-table; vertical-align: middle;"><tr><td style="width: 20px; height: 20px;"></td><td style="width: 20px; height: 20px;"></td></tr></table>                                                                                                                                                                                          |                                                                                                                                                                                    |                                                           | <table border="1" style="display: inline-table; vertical-align: middle;"><tr><td style="width: 20px; height: 20px;"></td><td style="width: 20px; height: 20px;"></td></tr></table> |                                 |                                                                                                                                                                                    | <table border="1" style="display: inline-table; vertical-align: middle;"><tr><td style="width: 20px; height: 20px;"></td><td style="width: 20px; height: 20px;"></td></tr></table> |  |      | <table border="1" style="display: inline-table; vertical-align: middle;"><tr><td style="width: 20px; height: 20px;"></td><td style="width: 20px; height: 20px;"></td></tr></table>                                                                                         |  |  | <table border="1" style="display: inline-table; vertical-align: middle;"><tr><td style="width: 20px; height: 20px;"></td><td style="width: 20px; height: 20px;"></td></tr></table> |  |  |
|                                                                                                                                                                          |                                                                                                 |                                                                                                                                                                                                                                                                                                                                                                             |                                                                                                                                                                                    |                                                           |                                                                                                                                                                                    |                                 |                                                                                                                                                                                    |                                                                                                                                                                                    |  |      |                                                                                                                                                                                                                                                                            |  |  |                                                                                                                                                                                    |  |  |
|                                                                                                                                                                          |                                                                                                 |                                                                                                                                                                                                                                                                                                                                                                             |                                                                                                                                                                                    |                                                           |                                                                                                                                                                                    |                                 |                                                                                                                                                                                    |                                                                                                                                                                                    |  |      |                                                                                                                                                                                                                                                                            |  |  |                                                                                                                                                                                    |  |  |
|                                                                                                                                                                          |                                                                                                 |                                                                                                                                                                                                                                                                                                                                                                             |                                                                                                                                                                                    |                                                           |                                                                                                                                                                                    |                                 |                                                                                                                                                                                    |                                                                                                                                                                                    |  |      |                                                                                                                                                                                                                                                                            |  |  |                                                                                                                                                                                    |  |  |
|                                                                                                                                                                          |                                                                                                 |                                                                                                                                                                                                                                                                                                                                                                             |                                                                                                                                                                                    |                                                           |                                                                                                                                                                                    |                                 |                                                                                                                                                                                    |                                                                                                                                                                                    |  |      |                                                                                                                                                                                                                                                                            |  |  |                                                                                                                                                                                    |  |  |
|                                                                                                                                                                          |                                                                                                 |                                                                                                                                                                                                                                                                                                                                                                             |                                                                                                                                                                                    |                                                           |                                                                                                                                                                                    |                                 |                                                                                                                                                                                    |                                                                                                                                                                                    |  |      |                                                                                                                                                                                                                                                                            |  |  |                                                                                                                                                                                    |  |  |
| 212                                                                                                                                                                      | Community health extension workers                                                              | <table border="1" style="display: inline-table; vertical-align: middle;"><tr><td style="width: 20px; height: 20px;"></td><td style="width: 20px; height: 20px;"></td></tr></table>                                                                                                                                                                                          |                                                                                                                                                                                    |                                                           | <table border="1" style="display: inline-table; vertical-align: middle;"><tr><td style="width: 20px; height: 20px;"></td><td style="width: 20px; height: 20px;"></td></tr></table> |                                 |                                                                                                                                                                                    | <table border="1" style="display: inline-table; vertical-align: middle;"><tr><td style="width: 20px; height: 20px;"></td><td style="width: 20px; height: 20px;"></td></tr></table> |  |      | <table border="1" style="display: inline-table; vertical-align: middle;"><tr><td style="width: 20px; height: 20px;"></td><td style="width: 20px; height: 20px;"></td></tr></table>                                                                                         |  |  | <table border="1" style="display: inline-table; vertical-align: middle;"><tr><td style="width: 20px; height: 20px;"></td><td style="width: 20px; height: 20px;"></td></tr></table> |  |  |
|                                                                                                                                                                          |                                                                                                 |                                                                                                                                                                                                                                                                                                                                                                             |                                                                                                                                                                                    |                                                           |                                                                                                                                                                                    |                                 |                                                                                                                                                                                    |                                                                                                                                                                                    |  |      |                                                                                                                                                                                                                                                                            |  |  |                                                                                                                                                                                    |  |  |
|                                                                                                                                                                          |                                                                                                 |                                                                                                                                                                                                                                                                                                                                                                             |                                                                                                                                                                                    |                                                           |                                                                                                                                                                                    |                                 |                                                                                                                                                                                    |                                                                                                                                                                                    |  |      |                                                                                                                                                                                                                                                                            |  |  |                                                                                                                                                                                    |  |  |
|                                                                                                                                                                          |                                                                                                 |                                                                                                                                                                                                                                                                                                                                                                             |                                                                                                                                                                                    |                                                           |                                                                                                                                                                                    |                                 |                                                                                                                                                                                    |                                                                                                                                                                                    |  |      |                                                                                                                                                                                                                                                                            |  |  |                                                                                                                                                                                    |  |  |
|                                                                                                                                                                          |                                                                                                 |                                                                                                                                                                                                                                                                                                                                                                             |                                                                                                                                                                                    |                                                           |                                                                                                                                                                                    |                                 |                                                                                                                                                                                    |                                                                                                                                                                                    |  |      |                                                                                                                                                                                                                                                                            |  |  |                                                                                                                                                                                    |  |  |
|                                                                                                                                                                          |                                                                                                 |                                                                                                                                                                                                                                                                                                                                                                             |                                                                                                                                                                                    |                                                           |                                                                                                                                                                                    |                                 |                                                                                                                                                                                    |                                                                                                                                                                                    |  |      |                                                                                                                                                                                                                                                                            |  |  |                                                                                                                                                                                    |  |  |
| 213                                                                                                                                                                      | Junior community health extension workers                                                       | <table border="1" style="display: inline-table; vertical-align: middle;"><tr><td style="width: 20px; height: 20px;"></td><td style="width: 20px; height: 20px;"></td></tr></table>                                                                                                                                                                                          |                                                                                                                                                                                    |                                                           | <table border="1" style="display: inline-table; vertical-align: middle;"><tr><td style="width: 20px; height: 20px;"></td><td style="width: 20px; height: 20px;"></td></tr></table> |                                 |                                                                                                                                                                                    | <table border="1" style="display: inline-table; vertical-align: middle;"><tr><td style="width: 20px; height: 20px;"></td><td style="width: 20px; height: 20px;"></td></tr></table> |  |      | <table border="1" style="display: inline-table; vertical-align: middle;"><tr><td style="width: 20px; height: 20px;"></td><td style="width: 20px; height: 20px;"></td></tr></table>                                                                                         |  |  | <table border="1" style="display: inline-table; vertical-align: middle;"><tr><td style="width: 20px; height: 20px;"></td><td style="width: 20px; height: 20px;"></td></tr></table> |  |  |
|                                                                                                                                                                          |                                                                                                 |                                                                                                                                                                                                                                                                                                                                                                             |                                                                                                                                                                                    |                                                           |                                                                                                                                                                                    |                                 |                                                                                                                                                                                    |                                                                                                                                                                                    |  |      |                                                                                                                                                                                                                                                                            |  |  |                                                                                                                                                                                    |  |  |
|                                                                                                                                                                          |                                                                                                 |                                                                                                                                                                                                                                                                                                                                                                             |                                                                                                                                                                                    |                                                           |                                                                                                                                                                                    |                                 |                                                                                                                                                                                    |                                                                                                                                                                                    |  |      |                                                                                                                                                                                                                                                                            |  |  |                                                                                                                                                                                    |  |  |
|                                                                                                                                                                          |                                                                                                 |                                                                                                                                                                                                                                                                                                                                                                             |                                                                                                                                                                                    |                                                           |                                                                                                                                                                                    |                                 |                                                                                                                                                                                    |                                                                                                                                                                                    |  |      |                                                                                                                                                                                                                                                                            |  |  |                                                                                                                                                                                    |  |  |
|                                                                                                                                                                          |                                                                                                 |                                                                                                                                                                                                                                                                                                                                                                             |                                                                                                                                                                                    |                                                           |                                                                                                                                                                                    |                                 |                                                                                                                                                                                    |                                                                                                                                                                                    |  |      |                                                                                                                                                                                                                                                                            |  |  |                                                                                                                                                                                    |  |  |
|                                                                                                                                                                          |                                                                                                 |                                                                                                                                                                                                                                                                                                                                                                             |                                                                                                                                                                                    |                                                           |                                                                                                                                                                                    |                                 |                                                                                                                                                                                    |                                                                                                                                                                                    |  |      |                                                                                                                                                                                                                                                                            |  |  |                                                                                                                                                                                    |  |  |
| 214                                                                                                                                                                      | Community volunteers attached to the health facility                                            | <table border="1" style="display: inline-table; vertical-align: middle;"><tr><td style="width: 20px; height: 20px;"></td><td style="width: 20px; height: 20px;"></td></tr></table>                                                                                                                                                                                          |                                                                                                                                                                                    |                                                           | <table border="1" style="display: inline-table; vertical-align: middle;"><tr><td style="width: 20px; height: 20px;"></td><td style="width: 20px; height: 20px;"></td></tr></table> |                                 |                                                                                                                                                                                    | <table border="1" style="display: inline-table; vertical-align: middle;"><tr><td style="width: 20px; height: 20px;"></td><td style="width: 20px; height: 20px;"></td></tr></table> |  |      | <table border="1" style="display: inline-table; vertical-align: middle;"><tr><td style="width: 20px; height: 20px;"></td><td style="width: 20px; height: 20px;"></td></tr></table>                                                                                         |  |  | <table border="1" style="display: inline-table; vertical-align: middle;"><tr><td style="width: 20px; height: 20px;"></td><td style="width: 20px; height: 20px;"></td></tr></table> |  |  |
|                                                                                                                                                                          |                                                                                                 |                                                                                                                                                                                                                                                                                                                                                                             |                                                                                                                                                                                    |                                                           |                                                                                                                                                                                    |                                 |                                                                                                                                                                                    |                                                                                                                                                                                    |  |      |                                                                                                                                                                                                                                                                            |  |  |                                                                                                                                                                                    |  |  |
|                                                                                                                                                                          |                                                                                                 |                                                                                                                                                                                                                                                                                                                                                                             |                                                                                                                                                                                    |                                                           |                                                                                                                                                                                    |                                 |                                                                                                                                                                                    |                                                                                                                                                                                    |  |      |                                                                                                                                                                                                                                                                            |  |  |                                                                                                                                                                                    |  |  |
|                                                                                                                                                                          |                                                                                                 |                                                                                                                                                                                                                                                                                                                                                                             |                                                                                                                                                                                    |                                                           |                                                                                                                                                                                    |                                 |                                                                                                                                                                                    |                                                                                                                                                                                    |  |      |                                                                                                                                                                                                                                                                            |  |  |                                                                                                                                                                                    |  |  |
|                                                                                                                                                                          |                                                                                                 |                                                                                                                                                                                                                                                                                                                                                                             |                                                                                                                                                                                    |                                                           |                                                                                                                                                                                    |                                 |                                                                                                                                                                                    |                                                                                                                                                                                    |  |      |                                                                                                                                                                                                                                                                            |  |  |                                                                                                                                                                                    |  |  |
|                                                                                                                                                                          |                                                                                                 |                                                                                                                                                                                                                                                                                                                                                                             |                                                                                                                                                                                    |                                                           |                                                                                                                                                                                    |                                 |                                                                                                                                                                                    |                                                                                                                                                                                    |  |      |                                                                                                                                                                                                                                                                            |  |  |                                                                                                                                                                                    |  |  |
| 215                                                                                                                                                                      | Community health officer                                                                        | <table border="1" style="display: inline-table; vertical-align: middle;"><tr><td style="width: 20px; height: 20px;"></td><td style="width: 20px; height: 20px;"></td></tr></table>                                                                                                                                                                                          |                                                                                                                                                                                    |                                                           | <table border="1" style="display: inline-table; vertical-align: middle;"><tr><td style="width: 20px; height: 20px;"></td><td style="width: 20px; height: 20px;"></td></tr></table> |                                 |                                                                                                                                                                                    | <table border="1" style="display: inline-table; vertical-align: middle;"><tr><td style="width: 20px; height: 20px;"></td><td style="width: 20px; height: 20px;"></td></tr></table> |  |      | <table border="1" style="display: inline-table; vertical-align: middle;"><tr><td style="width: 20px; height: 20px;"></td><td style="width: 20px; height: 20px;"></td></tr></table>                                                                                         |  |  | <table border="1" style="display: inline-table; vertical-align: middle;"><tr><td style="width: 20px; height: 20px;"></td><td style="width: 20px; height: 20px;"></td></tr></table> |  |  |
|                                                                                                                                                                          |                                                                                                 |                                                                                                                                                                                                                                                                                                                                                                             |                                                                                                                                                                                    |                                                           |                                                                                                                                                                                    |                                 |                                                                                                                                                                                    |                                                                                                                                                                                    |  |      |                                                                                                                                                                                                                                                                            |  |  |                                                                                                                                                                                    |  |  |
|                                                                                                                                                                          |                                                                                                 |                                                                                                                                                                                                                                                                                                                                                                             |                                                                                                                                                                                    |                                                           |                                                                                                                                                                                    |                                 |                                                                                                                                                                                    |                                                                                                                                                                                    |  |      |                                                                                                                                                                                                                                                                            |  |  |                                                                                                                                                                                    |  |  |
|                                                                                                                                                                          |                                                                                                 |                                                                                                                                                                                                                                                                                                                                                                             |                                                                                                                                                                                    |                                                           |                                                                                                                                                                                    |                                 |                                                                                                                                                                                    |                                                                                                                                                                                    |  |      |                                                                                                                                                                                                                                                                            |  |  |                                                                                                                                                                                    |  |  |
|                                                                                                                                                                          |                                                                                                 |                                                                                                                                                                                                                                                                                                                                                                             |                                                                                                                                                                                    |                                                           |                                                                                                                                                                                    |                                 |                                                                                                                                                                                    |                                                                                                                                                                                    |  |      |                                                                                                                                                                                                                                                                            |  |  |                                                                                                                                                                                    |  |  |
|                                                                                                                                                                          |                                                                                                 |                                                                                                                                                                                                                                                                                                                                                                             |                                                                                                                                                                                    |                                                           |                                                                                                                                                                                    |                                 |                                                                                                                                                                                    |                                                                                                                                                                                    |  |      |                                                                                                                                                                                                                                                                            |  |  |                                                                                                                                                                                    |  |  |
| 216                                                                                                                                                                      | Other (Specify): _____                                                                          | <table border="1" style="display: inline-table; vertical-align: middle;"><tr><td style="width: 20px; height: 20px;"></td><td style="width: 20px; height: 20px;"></td></tr></table>                                                                                                                                                                                          |                                                                                                                                                                                    |                                                           | <table border="1" style="display: inline-table; vertical-align: middle;"><tr><td style="width: 20px; height: 20px;"></td><td style="width: 20px; height: 20px;"></td></tr></table> |                                 |                                                                                                                                                                                    | <table border="1" style="display: inline-table; vertical-align: middle;"><tr><td style="width: 20px; height: 20px;"></td><td style="width: 20px; height: 20px;"></td></tr></table> |  |      | <table border="1" style="display: inline-table; vertical-align: middle;"><tr><td style="width: 20px; height: 20px;"></td><td style="width: 20px; height: 20px;"></td></tr></table>                                                                                         |  |  | <table border="1" style="display: inline-table; vertical-align: middle;"><tr><td style="width: 20px; height: 20px;"></td><td style="width: 20px; height: 20px;"></td></tr></table> |  |  |
|                                                                                                                                                                          |                                                                                                 |                                                                                                                                                                                                                                                                                                                                                                             |                                                                                                                                                                                    |                                                           |                                                                                                                                                                                    |                                 |                                                                                                                                                                                    |                                                                                                                                                                                    |  |      |                                                                                                                                                                                                                                                                            |  |  |                                                                                                                                                                                    |  |  |
|                                                                                                                                                                          |                                                                                                 |                                                                                                                                                                                                                                                                                                                                                                             |                                                                                                                                                                                    |                                                           |                                                                                                                                                                                    |                                 |                                                                                                                                                                                    |                                                                                                                                                                                    |  |      |                                                                                                                                                                                                                                                                            |  |  |                                                                                                                                                                                    |  |  |
|                                                                                                                                                                          |                                                                                                 |                                                                                                                                                                                                                                                                                                                                                                             |                                                                                                                                                                                    |                                                           |                                                                                                                                                                                    |                                 |                                                                                                                                                                                    |                                                                                                                                                                                    |  |      |                                                                                                                                                                                                                                                                            |  |  |                                                                                                                                                                                    |  |  |
|                                                                                                                                                                          |                                                                                                 |                                                                                                                                                                                                                                                                                                                                                                             |                                                                                                                                                                                    |                                                           |                                                                                                                                                                                    |                                 |                                                                                                                                                                                    |                                                                                                                                                                                    |  |      |                                                                                                                                                                                                                                                                            |  |  |                                                                                                                                                                                    |  |  |
|                                                                                                                                                                          |                                                                                                 |                                                                                                                                                                                                                                                                                                                                                                             |                                                                                                                                                                                    |                                                           |                                                                                                                                                                                    |                                 |                                                                                                                                                                                    |                                                                                                                                                                                    |  |      |                                                                                                                                                                                                                                                                            |  |  |                                                                                                                                                                                    |  |  |
| <b>Section 3: Patient Access and Capacity</b>                                                                                                                            |                                                                                                 |                                                                                                                                                                                                                                                                                                                                                                             |                                                                                                                                                                                    |                                                           |                                                                                                                                                                                    |                                 |                                                                                                                                                                                    |                                                                                                                                                                                    |  |      |                                                                                                                                                                                                                                                                            |  |  |                                                                                                                                                                                    |  |  |
| Use site ledgers and the HTN registry to capture the following information. The time frame should be approximately 3 working days, inclusive of the start and end dates. |                                                                                                 |                                                                                                                                                                                                                                                                                                                                                                             |                                                                                                                                                                                    |                                                           |                                                                                                                                                                                    |                                 |                                                                                                                                                                                    |                                                                                                                                                                                    |  |      |                                                                                                                                                                                                                                                                            |  |  |                                                                                                                                                                                    |  |  |
| 329                                                                                                                                                                      | Start Date                                                                                      | Day                                                                                                                                                                                                                                                                                                                                                                         | <table border="1" style="display: inline-table; vertical-align: middle;"><tr><td style="width: 20px; height: 20px;"></td><td style="width: 20px; height: 20px;"></td></tr></table> |                                                           |                                                                                                                                                                                    | Month                           | <table border="1" style="display: inline-table; vertical-align: middle;"><tr><td style="width: 20px; height: 20px;"></td><td style="width: 20px; height: 20px;"></td></tr></table> |                                                                                                                                                                                    |  | Year | <table border="1" style="display: inline-table; vertical-align: middle;"><tr><td style="width: 20px; height: 20px;"></td><td style="width: 20px; height: 20px;"></td><td style="width: 20px; height: 20px;"></td><td style="width: 20px; height: 20px;"></td></tr></table> |  |  |                                                                                                                                                                                    |  |  |
|                                                                                                                                                                          |                                                                                                 |                                                                                                                                                                                                                                                                                                                                                                             |                                                                                                                                                                                    |                                                           |                                                                                                                                                                                    |                                 |                                                                                                                                                                                    |                                                                                                                                                                                    |  |      |                                                                                                                                                                                                                                                                            |  |  |                                                                                                                                                                                    |  |  |
|                                                                                                                                                                          |                                                                                                 |                                                                                                                                                                                                                                                                                                                                                                             |                                                                                                                                                                                    |                                                           |                                                                                                                                                                                    |                                 |                                                                                                                                                                                    |                                                                                                                                                                                    |  |      |                                                                                                                                                                                                                                                                            |  |  |                                                                                                                                                                                    |  |  |
|                                                                                                                                                                          |                                                                                                 |                                                                                                                                                                                                                                                                                                                                                                             |                                                                                                                                                                                    |                                                           |                                                                                                                                                                                    |                                 |                                                                                                                                                                                    |                                                                                                                                                                                    |  |      |                                                                                                                                                                                                                                                                            |  |  |                                                                                                                                                                                    |  |  |
| 330                                                                                                                                                                      | End Date                                                                                        | Day                                                                                                                                                                                                                                                                                                                                                                         | <table border="1" style="display: inline-table; vertical-align: middle;"><tr><td style="width: 20px; height: 20px;"></td><td style="width: 20px; height: 20px;"></td></tr></table> |                                                           |                                                                                                                                                                                    | Month                           | <table border="1" style="display: inline-table; vertical-align: middle;"><tr><td style="width: 20px; height: 20px;"></td><td style="width: 20px; height: 20px;"></td></tr></table> |                                                                                                                                                                                    |  | Year | <table border="1" style="display: inline-table; vertical-align: middle;"><tr><td style="width: 20px; height: 20px;"></td><td style="width: 20px; height: 20px;"></td><td style="width: 20px; height: 20px;"></td><td style="width: 20px; height: 20px;"></td></tr></table> |  |  |                                                                                                                                                                                    |  |  |
|                                                                                                                                                                          |                                                                                                 |                                                                                                                                                                                                                                                                                                                                                                             |                                                                                                                                                                                    |                                                           |                                                                                                                                                                                    |                                 |                                                                                                                                                                                    |                                                                                                                                                                                    |  |      |                                                                                                                                                                                                                                                                            |  |  |                                                                                                                                                                                    |  |  |
|                                                                                                                                                                          |                                                                                                 |                                                                                                                                                                                                                                                                                                                                                                             |                                                                                                                                                                                    |                                                           |                                                                                                                                                                                    |                                 |                                                                                                                                                                                    |                                                                                                                                                                                    |  |      |                                                                                                                                                                                                                                                                            |  |  |                                                                                                                                                                                    |  |  |
|                                                                                                                                                                          |                                                                                                 |                                                                                                                                                                                                                                                                                                                                                                             |                                                                                                                                                                                    |                                                           |                                                                                                                                                                                    |                                 |                                                                                                                                                                                    |                                                                                                                                                                                    |  |      |                                                                                                                                                                                                                                                                            |  |  |                                                                                                                                                                                    |  |  |
| 331                                                                                                                                                                      | What is the total number of adult patient visits to the health facility within the given dates? | Total No. of Adult Patient Visits: <table border="1" style="display: inline-table; vertical-align: middle;"><tr><td style="width: 20px; height: 20px;"></td><td style="width: 20px; height: 20px;"></td><td style="width: 20px; height: 20px;"></td><td style="width: 20px; height: 20px;"></td></tr></table>                                                               |                                                                                                                                                                                    |                                                           |                                                                                                                                                                                    |                                 |                                                                                                                                                                                    |                                                                                                                                                                                    |  |      |                                                                                                                                                                                                                                                                            |  |  |                                                                                                                                                                                    |  |  |
|                                                                                                                                                                          |                                                                                                 |                                                                                                                                                                                                                                                                                                                                                                             |                                                                                                                                                                                    |                                                           |                                                                                                                                                                                    |                                 |                                                                                                                                                                                    |                                                                                                                                                                                    |  |      |                                                                                                                                                                                                                                                                            |  |  |                                                                                                                                                                                    |  |  |
| 332                                                                                                                                                                      | Of these adult patients, how many had their BP checked during their visit?                      | No. of Adult Patients with BP Checked: <table border="1" style="display: inline-table; vertical-align: middle;"><tr><td style="width: 20px; height: 20px;"></td><td style="width: 20px; height: 20px;"></td><td style="width: 20px; height: 20px;"></td><td style="width: 20px; height: 20px;"></td></tr></table>                                                           |                                                                                                                                                                                    |                                                           |                                                                                                                                                                                    |                                 |                                                                                                                                                                                    |                                                                                                                                                                                    |  |      |                                                                                                                                                                                                                                                                            |  |  |                                                                                                                                                                                    |  |  |
|                                                                                                                                                                          |                                                                                                 |                                                                                                                                                                                                                                                                                                                                                                             |                                                                                                                                                                                    |                                                           |                                                                                                                                                                                    |                                 |                                                                                                                                                                                    |                                                                                                                                                                                    |  |      |                                                                                                                                                                                                                                                                            |  |  |                                                                                                                                                                                    |  |  |
| 333                                                                                                                                                                      | Of the patients who had their BP checked, how many had high BP?                                 | No. of Adult Patients with High BP: <table border="1" style="display: inline-table; vertical-align: middle;"><tr><td style="width: 20px; height: 20px;"></td><td style="width: 20px; height: 20px;"></td><td style="width: 20px; height: 20px;"></td><td style="width: 20px; height: 20px;"></td></tr></table>                                                              |                                                                                                                                                                                    |                                                           |                                                                                                                                                                                    |                                 |                                                                                                                                                                                    |                                                                                                                                                                                    |  |      |                                                                                                                                                                                                                                                                            |  |  |                                                                                                                                                                                    |  |  |
|                                                                                                                                                                          |                                                                                                 |                                                                                                                                                                                                                                                                                                                                                                             |                                                                                                                                                                                    |                                                           |                                                                                                                                                                                    |                                 |                                                                                                                                                                                    |                                                                                                                                                                                    |  |      |                                                                                                                                                                                                                                                                            |  |  |                                                                                                                                                                                    |  |  |
| 334                                                                                                                                                                      | Of the patients with high BP, how many were newly or already registered?                        | No. Newly or Already Registered: <table border="1" style="display: inline-table; vertical-align: middle;"><tr><td style="width: 20px; height: 20px;"></td><td style="width: 20px; height: 20px;"></td><td style="width: 20px; height: 20px;"></td><td style="width: 20px; height: 20px;"></td></tr></table>                                                                 |                                                                                                                                                                                    |                                                           |                                                                                                                                                                                    |                                 |                                                                                                                                                                                    |                                                                                                                                                                                    |  |      |                                                                                                                                                                                                                                                                            |  |  |                                                                                                                                                                                    |  |  |
|                                                                                                                                                                          |                                                                                                 |                                                                                                                                                                                                                                                                                                                                                                             |                                                                                                                                                                                    |                                                           |                                                                                                                                                                                    |                                 |                                                                                                                                                                                    |                                                                                                                                                                                    |  |      |                                                                                                                                                                                                                                                                            |  |  |                                                                                                                                                                                    |  |  |
| <b>Section 4h: Basic Equipment: All equipment must be available and functioning</b>                                                                                      |                                                                                                 |                                                                                                                                                                                                                                                                                                                                                                             |                                                                                                                                                                                    |                                                           |                                                                                                                                                                                    |                                 |                                                                                                                                                                                    |                                                                                                                                                                                    |  |      |                                                                                                                                                                                                                                                                            |  |  |                                                                                                                                                                                    |  |  |

| No.                                                                                                                                                        | Question                                                                                                                       | Result                                                         |                            |                            |                            |                            |                                 |                            |      |
|------------------------------------------------------------------------------------------------------------------------------------------------------------|--------------------------------------------------------------------------------------------------------------------------------|----------------------------------------------------------------|----------------------------|----------------------------|----------------------------|----------------------------|---------------------------------|----------------------------|------|
|                                                                                                                                                            |                                                                                                                                | A) Available<br>If observed or reported,<br>complete section B |                            |                            | B) Functioning             |                            |                                 |                            |      |
| Please tell me if the following basic equipment and supplies used in the provision of client services are available and functional in this facility today. |                                                                                                                                | Observed                                                       | Reported not seen          | Not available              | Yes                        | No                         | Don't know                      |                            |      |
| Ask to see the items                                                                                                                                       |                                                                                                                                |                                                                |                            |                            |                            |                            |                                 |                            |      |
| 501                                                                                                                                                        | Adult weighing scale                                                                                                           | 1 <input type="checkbox"/>                                     | 2 <input type="checkbox"/> | 3 <input type="checkbox"/> | 1 <input type="checkbox"/> | 2 <input type="checkbox"/> | 8 <input type="checkbox"/>      |                            |      |
| 504                                                                                                                                                        | Measuring tape-height board / stadiometre                                                                                      | 1 <input type="checkbox"/>                                     | 2 <input type="checkbox"/> | 3 <input type="checkbox"/> | 1 <input type="checkbox"/> | 2 <input type="checkbox"/> | 8 <input type="checkbox"/>      |                            |      |
| 507                                                                                                                                                        | Blood pressure apparatus (may be digital or manual sphygmomanometer with stethoscope)                                          | 1 <input type="checkbox"/>                                     | 2 <input type="checkbox"/> | 3 <input type="checkbox"/> | 1 <input type="checkbox"/> | 2 <input type="checkbox"/> | 8 <input type="checkbox"/>      |                            |      |
| <b>Section 5: Available Services: All answers must be "Yes"</b>                                                                                            |                                                                                                                                |                                                                |                            |                            |                            |                            |                                 |                            |      |
| 2014                                                                                                                                                       | Are the registry and patient treatment cards for the HTN Program available in the facility today?                              |                                                                |                            |                            |                            |                            | Yes                             | 1 <input type="checkbox"/> |      |
|                                                                                                                                                            |                                                                                                                                |                                                                |                            |                            |                            |                            | No                              | 2 <input type="checkbox"/> |      |
| 2018                                                                                                                                                       | How many patient treatment cards were dispensed by the monitor to the facility today?                                          |                                                                |                            |                            |                            |                            | _____ Treatment Cards           |                            |      |
| <b>Site Supervision</b>                                                                                                                                    |                                                                                                                                |                                                                |                            |                            |                            |                            |                                 |                            |      |
| <b>Section 12: Training</b>                                                                                                                                |                                                                                                                                |                                                                |                            |                            |                            |                            |                                 |                            |      |
| 7000                                                                                                                                                       | How many patient treatment cards were reviewed during the site monitoring visit today?                                         |                                                                |                            |                            |                            |                            | _____ Treatment Cards           |                            |      |
| 7001                                                                                                                                                       | Of the cards that were reviewed today, how many had errors that required revision?                                             |                                                                |                            |                            |                            |                            | _____ Treatment Cards           |                            |      |
| 7002                                                                                                                                                       | Were patient blood pressure measurements directly observed during the site visit today?                                        |                                                                |                            |                            |                            |                            | No                              | 0 <input type="checkbox"/> | 7005 |
|                                                                                                                                                            |                                                                                                                                |                                                                |                            |                            |                            |                            | Yes                             | 1 <input type="checkbox"/> |      |
| 7003                                                                                                                                                       | If patient blood pressure measurements were not observed, why not?                                                             | _____                                                          |                            |                            |                            |                            |                                 |                            |      |
| 7004                                                                                                                                                       | If patient blood pressure measurements were not observed, was the staff asked to measure the blood pressure of the supervisor? |                                                                |                            |                            |                            |                            | No                              | 0 <input type="checkbox"/> | 7007 |
|                                                                                                                                                            |                                                                                                                                |                                                                |                            |                            |                            |                            | Yes                             | 1 <input type="checkbox"/> |      |
| 7005                                                                                                                                                       | How many site staff were observed measuring blood pressure during the site visit today?                                        |                                                                |                            |                            |                            |                            | _____ Staff                     |                            |      |
| 7006                                                                                                                                                       | Overall, were blood pressures measured per protocol?                                                                           |                                                                |                            |                            |                            |                            | No                              | 0 <input type="checkbox"/> |      |
|                                                                                                                                                            |                                                                                                                                |                                                                |                            |                            |                            |                            | Yes                             | 1 <input type="checkbox"/> |      |
| 7007                                                                                                                                                       | Overall, was data captured per protocol?                                                                                       |                                                                |                            |                            |                            |                            | No                              | 0 <input type="checkbox"/> |      |
|                                                                                                                                                            |                                                                                                                                |                                                                |                            |                            |                            |                            | Yes                             | 1 <input type="checkbox"/> |      |
| 7008                                                                                                                                                       | Was retraining provided today on either blood pressure measurement or data capture?                                            |                                                                |                            |                            |                            |                            | No                              | 0 <input type="checkbox"/> |      |
|                                                                                                                                                            |                                                                                                                                |                                                                |                            |                            |                            |                            | Yes, blood pressure measurement | 1 <input type="checkbox"/> |      |
|                                                                                                                                                            |                                                                                                                                |                                                                |                            |                            |                            |                            | Yes, data capture               | 2 <input type="checkbox"/> |      |
|                                                                                                                                                            |                                                                                                                                |                                                                |                            |                            |                            |                            | Yes, both                       | 3 <input type="checkbox"/> |      |
| Comments about the assessment:                                                                                                                             |                                                                                                                                |                                                                |                            |                            |                            |                            |                                 |                            |      |

| No.                                                                                                                                                                                                                                                                             | Question             | Result                                      |                        |                                 |                                                  |
|---------------------------------------------------------------------------------------------------------------------------------------------------------------------------------------------------------------------------------------------------------------------------------|----------------------|---------------------------------------------|------------------------|---------------------------------|--------------------------------------------------|
| Signature of HTN team member: _____ Signature of site representative: _____                                                                                                                                                                                                     |                      |                                             |                        |                                 |                                                  |
| <b>Section 7: Medicines and Commodities:</b> Recorded for information only                                                                                                                                                                                                      |                      |                                             |                        |                                 |                                                  |
| If any of the following medications are in stock, record the quantity on hand today. If any have been dispensed in the last 30-days, including today, record the quantity of 30-day doses dispensed.                                                                            |                      |                                             |                        |                                 |                                                  |
|                                                                                                                                                                                                                                                                                 | Drug Class           | Generic Name                                | Dosage (mg)            | Number of 30-day doses in stock | Number of 30-day doses dispensed in last 30 days |
| 4029                                                                                                                                                                                                                                                                            | ACE Inhibitor        | Lisinopril                                  | 10 mg                  | _____                           | _____                                            |
| 4030                                                                                                                                                                                                                                                                            | ACE Inhibitor        | Lisinopril                                  | 5 mg                   | _____                           | _____                                            |
| 4031                                                                                                                                                                                                                                                                            | Diuretic             | Hydrochlorothiazide                         | 50 mg                  | _____                           | _____                                            |
| 4032                                                                                                                                                                                                                                                                            | Diuretic             | Hydrochlorothiazide                         | 25 mg                  | _____                           | _____                                            |
| 4033                                                                                                                                                                                                                                                                            | Diuretic             | Hydrochlorothiazide                         | 12.5 mg                | _____                           | _____                                            |
| 4034                                                                                                                                                                                                                                                                            | Diuretic             | Spironolactone                              | 50 mg                  | _____                           | _____                                            |
| 4035                                                                                                                                                                                                                                                                            | Diuretic             | Spironolactone                              | 25 mg                  | _____                           | _____                                            |
| 4036                                                                                                                                                                                                                                                                            | Diuretic             | Spironolactone                              | 12.5 mg                | _____                           | _____                                            |
| 4037                                                                                                                                                                                                                                                                            | Diuretic             | Amiloride / Hydrochloride                   | 5 mg / 50 mg           | _____                           | _____                                            |
| 4038                                                                                                                                                                                                                                                                            | CCB                  | Amlodipine                                  | 10 mg                  | _____                           | _____                                            |
| 4039                                                                                                                                                                                                                                                                            | CCB                  | Amlodipine                                  | 5 mg                   | _____                           | _____                                            |
| 4040                                                                                                                                                                                                                                                                            | CCB                  | Nifedipine                                  | 30 mg                  | _____                           | _____                                            |
| 4041                                                                                                                                                                                                                                                                            | CCB                  | Nifedipine                                  | 20 mg                  | _____                           | _____                                            |
| 4042                                                                                                                                                                                                                                                                            | Central Acting Agent | Methyldopa                                  | 250 mg                 | _____                           | _____                                            |
| 4043                                                                                                                                                                                                                                                                            | Vasodilator          | Hydralazine                                 | 20 mg                  | _____                           | _____                                            |
| 4044                                                                                                                                                                                                                                                                            | Beta Blocker         | Labetalol                                   | 200 mg                 | _____                           | _____                                            |
| 4045                                                                                                                                                                                                                                                                            | Beta Blocker         | Propranolol                                 | 40 mg                  | _____                           | _____                                            |
| 4046                                                                                                                                                                                                                                                                            | Beta Blocker         | Propranolol                                 | 10 mg                  | _____                           | _____                                            |
| 4047                                                                                                                                                                                                                                                                            | ARB                  | Telmisartan                                 | 40 mg                  | _____                           | _____                                            |
| 4048                                                                                                                                                                                                                                                                            | ARB                  | Telmisartan                                 | 80 mg                  | _____                           | _____                                            |
| 4049                                                                                                                                                                                                                                                                            | ARB                  | Losartan                                    | 50 mg                  | _____                           | _____                                            |
| 4050                                                                                                                                                                                                                                                                            | ARB/CCB              | Losartan/Amlodipine                         | 50 mg / 5mg            | _____                           | _____                                            |
| 4051                                                                                                                                                                                                                                                                            | ARB/CCB/Diuretic     | Losartan/Amlodipine/<br>Hydrochlorothiazide | 50 mg /<br>5mg/12.5 mg | _____                           | _____                                            |
| Capture any other current HYPERTENSION medication inventory (including ACE inhibitors, Thiazides, Angiotensin Receptor Blockers[ARB], Other diuretics, Beta blockers, and Calcium channel blockers[CCB]), as well as fixed dose combinations not captured in the section above: |                      |                                             |                        |                                 |                                                  |
|                                                                                                                                                                                                                                                                                 | Drug Class           | Generic Name                                | Dosage (mg)            | Number of 30-day doses in stock | Number of 30-day doses dispensed in last 30 days |
| 4052                                                                                                                                                                                                                                                                            | _____                | _____                                       | _____                  | _____                           | _____                                            |
| 4053                                                                                                                                                                                                                                                                            | _____                | _____                                       | _____                  | _____                           | _____                                            |

| No.  | Question | Result |  |  |  |
|------|----------|--------|--|--|--|
| 4054 |          |        |  |  |  |
| 4055 |          |        |  |  |  |
| 4056 |          |        |  |  |  |
| 4057 |          |        |  |  |  |
| 4058 |          |        |  |  |  |
| 4059 |          |        |  |  |  |
| 4060 |          |        |  |  |  |
